# Supplementary material for: Regioselective coupling of benzyl chlorides with allyl and allenyl boronates catalysed by a bidentate phosphine ligand/palladium catalyst
Source: Royal Society of Chemistry journal article supplement (doi:10.1039/d3cc00279a), 2023-01-01
Supplement: d3cc00279a1.pdf [file d3cc00279a1.pdf]

## Supporting Information

### Regioselective Coupling of Benzyl Chlorides with Allyl and Allenyl Boronates Catalysed by Bidentate Phosphine Ligand/Palladium Catalyst

Sheng Zhang,<sup>\*a</sup> Junchao Yin,<sup>a</sup> Ziyang Wang,<sup>a</sup> Yang Li,<sup>\*b</sup> Yukang Fu,<sup>b</sup> Ji Ma,<sup>a</sup>  
Zhilong Xie,<sup>a</sup> and Ming Bao<sup>\*a,b</sup>

<sup>a</sup> State Key Laboratory of Fine Chemicals, Dalian University of Technology, Dalian 116023,  
China

<sup>b</sup> School of Chemical Engineering, Dalian University of Technology, Panjin 124221, China

#### Table of Contents

|                                                                                            |     |
|--------------------------------------------------------------------------------------------|-----|
| 1. General Information.....                                                                | S2  |
| 2. General Experimental Procedures.....                                                    | S2  |
| 3. Reaction Condition Screening of <b>1j</b> .....                                         | S2  |
| 4. Procedure for the synthesis of <b>2c</b> .....                                          | S3  |
| 5. The Characterization of Products.....                                                   | S4  |
| 6. Computational Details .....                                                             | S9  |
| 7. Cartesian Coordinates of the Computed Structures .....                                  | S10 |
| 8. References.....                                                                         | S16 |
| 9. Copies of <sup>1</sup> H, <sup>13</sup> C, <sup>19</sup> F NMR Spectra of Products..... | S17 |
| 10. Copies of HR MS of Products.....                                                       | S39 |

---

## 1. General Information

$^1\text{H}$ ,  $^{13}\text{C}$  and  $^{19}\text{F}$  NMR spectra were recorded on either a Varian Inova-400 spectrometer (400 MHz for  $^1\text{H}$ , 100 MHz for  $^{13}\text{C}$ , 376 MHz for  $^{19}\text{F}$ ) or a Bruker Avance II-400 spectrometer (400 MHz for  $^1\text{H}$ , 100 MHz for  $^{13}\text{C}$ , 376 MHz for  $^{19}\text{F}$ );  $\text{CDCl}_3$  was used as a solvent, while TMS was used as an internal standard. The chemical shifts are reported in ppm downfield ( $\delta$ ) from TMS, the coupling constants  $J$  are given in Hz. The peak patterns are indicated as follows: s, singlet; d, doublet; t, triplet; q, quartet; m, multiplet. TLC was carried out on  $\text{SiO}_2$  (silica gel 60 F254, Merck), and the spots were located with UV light. Flash chromatography was carried out on  $\text{SiO}_2$  (silica gel 60, 200-300 meth). GC-MS analysis was performed on an Agilent 7890A GC interfaced to an Agilent 5975C mass-selective detector (30 m  $\times$  0.25 mm capillary column, HP-5MS). IR spectra were recorded on a NEXUS FT-IR spectrometer. High resolution mass spectra were recorded on either a Q-TOF mass spectrometry or a GC-TOF mass spectrometry. All reactions were carried out under nitrogen atmospheric pressure. The starting materials were purchased from Energy Chemicals Co. Ltd.

## 2. General Experimental Procedures

Representative Procedure: A reaction flask was charged with a mixture of benzyl chlorides (0.2 mmol, 28.1 mg), allyl pinacolborate (0.4 mmol, 67.2 mg),  $\text{Pd}(\text{OAc})_2$  (0.01 mmol, 2.3 mg, 5 mol%), Xantphos (0.015 mmol, 8.7 mg, 7.5 mol%), CsF (0.6 mmol, 91.1 mg), THF (2.0 mL) under  $\text{N}_2$  atmosphere. The reaction mixture was stirred at 80 °C for 12 h, and then was cooled to room temperature. The solvent was removed under reduced pressure, and the residue obtained was purified via silica gel chromatography (eluent: petroleum ether) to afford corresponding product **3a** in 83% yield.

## 3. Reaction Condition Screening of **1j**

When 1-(Chloromethyl)naphthalene was investigated under the optimized reaction conditions [ $\text{Pd}(\text{OAc})_2$  (5 mol%), Xantphos (7.5 mol%), and CsF (3.0 equiv.) in THF at 80 °C for 12 h.], the normal coupling product **3j** was obtained in 26% yield along with *para*-allylation product **3ja** in 37% yield (Table S1, Entry 1). The reaction of 1-(Chloromethyl)naphthalene (**1j**) with allyl pinacolborate (**2a**) was selected as a model to optimize the reaction conditions. The results are summarized in Table S1.

**Table S1. Reaction Condition Screening<sup>a</sup>**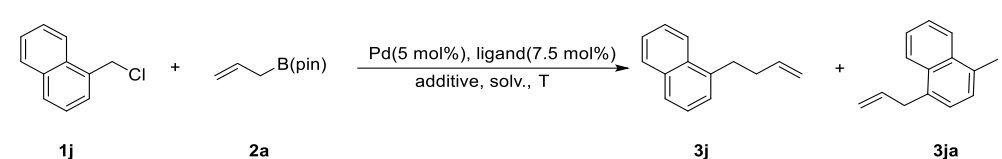

| Entry           | Pd/ligand                                            | Additive | Solv.              | T (°C) | 3j(%) <sup>b</sup> | 3ja(%) <sup>b</sup> |
|-----------------|------------------------------------------------------|----------|--------------------|--------|--------------------|---------------------|
| 1               | Pd(OAc) <sub>2</sub> /Xantphos                       | CsF      | THF                | 80     | 26                 | 37                  |
| 2               | Pd <sub>2</sub> dba <sub>3</sub> /Xantphos           | CsF      | THF                | 80     | trace              | trace               |
| 3               | Pd(dba) <sub>2</sub> /Xantphos                       | CsF      | THF                | 80     | trace              | trace               |
| 4               | Pd(PPh <sub>3</sub> ) <sub>4</sub> /Xantphos         | CsF      | THF                | 80     | trace              | trace               |
| 5               | Pd(opiv) <sub>2</sub> /Xantphos                      | CsF      | THF                | 80     | 35                 | 40                  |
| 6               | PdCl <sub>2</sub> /Xantphos                          | CsF      | THF                | 80     | trace              | trace               |
| 7               | Pd(PPh <sub>3</sub> )Cl <sub>2</sub> /Xantphos       | CsF      | THF                | 80     | 44                 | 41                  |
| 8               | Pd(TFA) <sub>2</sub> /Xantphos                       | CsF      | THF                | 80     | 18                 | 61                  |
| 9               | Pd(PPh <sub>3</sub> )Cl <sub>2</sub> /Xantphos       | CsF      | Dioxane            | 80     | 51                 | 17                  |
| 10              | Pd(PPh <sub>3</sub> )Cl <sub>2</sub> /Xantphos       | CsF      | DCE                | 80     | 70                 | 0                   |
| 11              | Pd(PPh <sub>3</sub> )Cl <sub>2</sub> /Xantphos       | CsF      | CH <sub>3</sub> CN | 80     | trace              | 56                  |
| 12              | Pd(PPh <sub>3</sub> )Cl <sub>2</sub> /Xantphos       | CsF      | DMSO               | 80     | 10                 | 16                  |
| 13              | Pd(PPh <sub>3</sub> )Cl <sub>2</sub> /Xantphos       | CsF      | Toluene            | 80     | trace              | trace               |
| 14              | Pd <sub>2</sub> (dba) <sub>3</sub> /PPh <sub>3</sub> | CsF      | DCE                | 80     | 64                 | 25                  |
| 15              | Pd(PPh <sub>3</sub> )Cl <sub>2</sub>                 | CsF      | DCE                | 80     | 33                 | 26                  |
| 16              | Pd(PPh <sub>3</sub> )Cl <sub>2</sub> /Xantphos       | CsF      | DCE                | 100    | trace              | trace               |
| 17              | Pd(PPh <sub>3</sub> )Cl <sub>2</sub> /Xantphos       | CsF      | DCE                | 120    | trace              | trace               |
| 18 <sup>c</sup> | Pd(PPh <sub>3</sub> )Cl <sub>2</sub> /Xantphos       | CsF      | DCE                | 80     | 51                 | trace               |

<sup>a</sup> Reaction conditions: benzyl chlorides (**1j**, 0.2 mmol), allyl pinacolboronate (**2a**, 0.4 mmol), Pd cat. (5 mol%), ligand (7.5 mol%), and CsF (0.6 mmol) in dry solvent (2.0 mL) at 80 °C under N<sub>2</sub> atmosphere. <sup>b</sup> NMR yield. <sup>c</sup> ligand (5 mol%)

#### 4. Procedure for the synthesis of **2c**.<sup>1</sup>

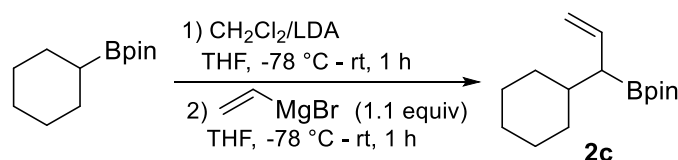

A THF solution of LDA (117 mg, 1.1 mmol) was added to a mixture of 2-cyclohexyl-4,4,5,5-tetramethyl-1,3,2-dioxaborolane (210 mg, 1 mmol, 1 equiv) and CH<sub>2</sub>Cl<sub>2</sub> (110 mg, 1.3 mmol, 1.3 equiv) in THF (2 mL) at -78 °C under atmosphere of nitrogen. The resulting mixture was stirred for 30 min and warmed to room temperature for another 1 h. The reaction mixture was cooled to -78 °C, and vinylmagnesium bromide (1M in THF, 1.1 mmol, 1.1 equiv) was added dropwise. After stirring for 30 min, the mixture

was warmed to room temperature stirring for 1 h. The reaction was quenched with aqueous  $\text{NH}_4\text{Cl}$ , and extracted with ether. After washing with brine and drying over anhydrous  $\text{Na}_2\text{SO}_4$ , the solvent was removed under vacuum. The crude product was purified by column chromatography on silica gel with (PE/EA = 100:1) to afford the title compound as a colorless liquid (154 mg, 62% yield).  $^1\text{H}$  NMR (400 MHz,  $\text{CDCl}_3$ ):  $\delta$  5.73 (dt,  $J = 17.0, 10.0$  Hz, 1H), 5.03–4.86 (m, 2H), 1.77 (d,  $J = 13.5$  Hz, 1H), 1.69–1.60 (m, 5H), 1.56–1.45 (m, 1H), 1.24 (s, 12H), 1.24–1.02 (m, 15H), 1.03–0.95 (m, 1H), 0.91–0.77 (m, 1H).

## 5. The Characterization of Products

The spectroscopic data of all the products are presented.

### 1-(but-3-en-1-yl)-4-methylbenzene (3a):<sup>2</sup>

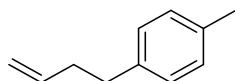

Colorless oil.  $^1\text{H}$  NMR (400 MHz,  $\text{CDCl}_3$ ):  $\delta$  7.09 (s, 4H), 5.92–5.80 (m, 1H), 5.08 – 4.94 (m, 2H), 2.67 (t,  $J = 8.0$  Hz, 2H), 2.36 (q,  $J = 8.0$  Hz, 2H), 2.32 (s, 3H);  $^{13}\text{C}$  NMR (100 MHz,  $\text{CDCl}_3$ ):  $\delta$  139.8, 138.2, 135.2, 128.9, 128.3, 114.8, 35.6, 34.9, 21.0.

### 1-(but-3-en-1-yl)-4-ethylbenzene (3b):<sup>3</sup>

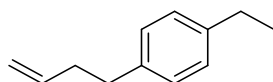

Colorless oil.  $^1\text{H}$  NMR (400 MHz,  $\text{CDCl}_3$ ):  $\delta$  7.11 (s, 4H), 5.92–5.90 (m, 1H), 5.09 – 4.95 (m, 2H), 2.68 (t,  $J = 8.0$  Hz, 2H), 2.62 (q,  $J = 8.0$  Hz, 2H), 2.36 (q,  $J = 8.0$  Hz, 2H), 1.22 (t,  $J = 8.0$  Hz, 3H);  $^{13}\text{C}$  NMR (100 MHz,  $\text{CDCl}_3$ ):  $\delta$  141.7, 139.1, 138.3, 128.4, 127.8, 114.8, 35.6, 34.9, 28.5, 15.7.

### 1-(but-3-en-1-yl)-4-(tert-butyl)benzene (3c):<sup>4</sup>

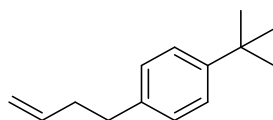

Colorless oil.  $^1\text{H}$  NMR (400 MHz,  $\text{CDCl}_3$ ):  $\delta$  7.35 (d,  $J = 8.0$  Hz, 2H), 7.18 (d,  $J = 8.0$  Hz, 2H), 5.98–5.96 (m, 1H), 5.14–4.99 (m, 2H), 2.76–2.69 (t,  $J = 8.0$  Hz, 2H), 2.44–2.39 (m, 2H), 1.36 (s, 9H);  $^{13}\text{C}$  NMR (100 MHz,  $\text{CDCl}_3$ ):  $\delta$  148.6, 138.8, 138.3, 128.1, 125.2, 114.8, 35.5, 34.8, 34.4, 31.4.

### 4-(but-3-en-1-yl)-1,1'-biphenyl (3d):<sup>3</sup>

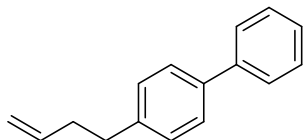

Colorless oil.  $^1\text{H}$  NMR (400 MHz,  $\text{CDCl}_3$ ):  $\delta$  7.58 (d,  $J = 7.3$  Hz, 2H), 7.51 (d,  $J = 8.1$  Hz, 2H), 7.42 (t,  $J = 7.6$  Hz, 2H), 7.32 (t,  $J = 7.3$  Hz, 1H), 7.26 (d,  $J = 8.0$  Hz, 2H), 5.94–5.84 (m, 1H), 5.09–4.99 (m, 2H), 2.77–2.73 (t,  $J = 8.0$  Hz, 2H), 2.44–2.38 (m, 2H);  $^{13}\text{C}$  NMR (100 MHz,  $\text{CDCl}_3$ ):  $\delta$  141.1, 141.0, 138.8, 138.1, 128.9, 128.7, 127.1, 127.0, 115.1, 35.5, 35.0.

**1-(but-3-en-1-yl)-4-nitrobenzene (3e):**<sup>3</sup>

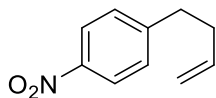

Yellow oil.  $^1\text{H}$  NMR (400 MHz,  $\text{CDCl}_3$ ):  $\delta$  8.14 (d,  $J = 8.0$  Hz, 2H), 7.33 (d,  $J = 8.0$  Hz, 2H), 5.97–5.75 (m, 1H), 5.08–4.98 (m, 2H), 2.82 (t,  $J = 8.0$  Hz, 2H), 2.41 (q,  $J = 8.0$  Hz, 2H);  $^{13}\text{C}$  NMR (100 MHz,  $\text{CDCl}_3$ ):  $\delta$  149.6, 136.8, 129.8, 129.2, 123.6, 115.8, 35.1, 34.8.

**1-(but-3-en-1-yl)-4-(trifluoromethyl)benzene (3f):**<sup>3</sup>

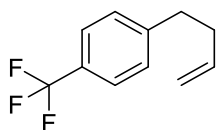

Colorless oil.  $^1\text{H}$  NMR (600 MHz,  $\text{CDCl}_3$ ):  $\delta$  7.53 (d,  $J = 12.0$  Hz, 2H), 7.29 (d,  $J = 12.0$  Hz, 2H), 5.86–5.79 (m, 1H), 5.14–4.99 (m, 2H), 2.76–2.69 (t,  $J = 8.0$  Hz, 2H), 2.38 (q,  $J = 6.0$  Hz, 2H), 1.36 (s, 9H);  $^{13}\text{C}$  NMR (150 MHz,  $\text{CDCl}_3$ ):  $\delta$  145.9, 137.3, 128.7, 125.4, 125.3, 125.2, 125.1, 115.4, 35.2, 35.1;  $^{19}\text{F}$  NMR (376 MHz,  $\text{CDCl}_3$ ):  $\delta$  -62.29 (s).

**4-(but-3-en-1-yl)benzonitrile (3g):**<sup>3</sup>

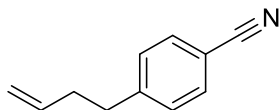

Yellow oil.  $^1\text{H}$  NMR (400 MHz,  $\text{CDCl}_3$ ):  $\delta$  7.57 (d,  $J = 7.7$  Hz, 2H), 7.28 (d,  $J = 7.6$  Hz, 2H), 5.97–5.75 (m, 1H), 5.07–4.98 (m, 2H), 2.77 (t,  $J = 6.0$  Hz, 2H), 2.38 (q,  $J = 7.2$  Hz, 2H);  $^{13}\text{C}$  NMR (100 MHz,  $\text{CDCl}_3$ ):  $\delta$  147.4, 136.9, 132.1, 129.2, 119.1, 115.7, 109.7, 35.4, 34.8.

**methyl 4-(but-3-en-1-yl)benzoate (3h):**<sup>3</sup>

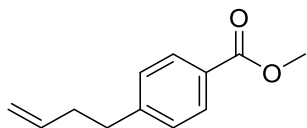

Yellow oil.  $^1\text{H}$  NMR (400 MHz,  $\text{CDCl}_3$ ):  $\delta$  7.95 (d,  $J = 7.5$  Hz, 2H), 7.25 (d,  $J = 7.7$  Hz, 2H), 5.89–5.76 (m, 1H), 5.07–4.96 (m, 2H), 3.90 (s, 3H), 2.76 (t,  $J = 7.7$  Hz, 2H), 2.38 (q,  $J = 7.1, 6.4$  Hz, 2H);  $^{13}\text{C}$  NMR (100 MHz,  $\text{CDCl}_3$ ):  $\delta$  167.1, 147.3, 137.4, 129.6, 128.9, 127.8, 115.3, 51.9, 35.3, 35.0.

**2-(but-3-en-1-yl)benzonitrile (3i):**<sup>5</sup>

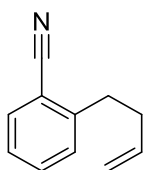

Yellow oil.  $^1\text{H}$  NMR (400 MHz,  $\text{CDCl}_3$ ):  $\delta$  7.63 (d,  $J = 7.7$  Hz, 1H), 7.53 (t,  $J = 7.2$  Hz, 1H), 7.36–7.28 (m, 2H), 5.93–5.81 (m, 1H), 5.10–4.99 (m, 2H), 2.97 (t,  $J = 4.0$  Hz, 2H), 2.46 (q,  $J = 7.5$  Hz, 2H);  $^{13}\text{C}$  NMR (100 MHz,  $\text{CDCl}_3$ ):  $\delta$  145.6, 136.7, 132.8, 132.6, 129.6, 126.5, 118.1, 115.9, 112.4, 34.7, 33.9.

**1-(but-3-en-1-yl)naphthalene (3j):**<sup>6</sup>

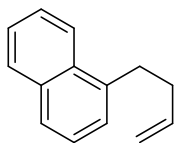

White solid.  $^1\text{H}$  NMR (600 MHz,  $\text{CDCl}_3$ ):  $\delta$  8.04 (s, 1H), 7.85 (s, 1H), 7.71 (s, 1H), 7.49 (d,  $J = 18.5$  Hz, 2H), 7.42–7.37 (m, 1H), 7.33 (s, 1H), 6.00–5.90 (m, 1H), 5.06 (dd,  $J = 47.3, 13.0$  Hz, 2H), 3.16 (s, 2H), 2.51 (s, 2H);  $^{13}\text{C}$  NMR (150 MHz,  $\text{CDCl}_3$ ):  $\delta$  138.2, 137.9, 128.8, 126.6, 125.9, 125.8, 125.5, 125.4, 123.77, 114.9, 34.8, 32.5.

**1-(but-3-en-1-yl)-3-methylnaphthalene (3k):**

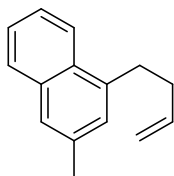

White solid.  $^1\text{H}$  NMR (400 MHz,  $\text{CDCl}_3$ ):  $\delta$  8.05–7.99 (m, 1H), 7.82–7.78 (m, 2H), 7.54–7.50 (m, 1H), 7.50–7.44 (m, 2H), 7.22 (d,  $J = 1.7$  Hz, 1H), 6.05–5.94 (m, 1H), 5.18–5.04 (m, 2H), 3.22–3.11 (m, 2H), 2.54 (d,  $J = 11.6$  Hz, 5H);  $^{13}\text{C}$  NMR (100 MHz,  $\text{CDCl}_3$ ):  $\delta$  138.3, 137.7, 135.0, 134.2, 130.0, 128.3, 128.1, 125.5, 125.4, 124.8, 123.5, 114.8, 34.9, 32.4, 21.6; IR (KBr) 2921, 2851, 1639, 1601, 1507, 1440, 1414, 1029, 864  $\text{cm}^{-1}$ ; HRMS (EI) calcd for  $\text{C}_{15}\text{H}_{16}$ : 196.1252  $[\text{M}]^+$ ; found: 196.1255.

---

**5-(but-3-en-1-yl)-2-(trifluoromethyl)pyridine (3l):**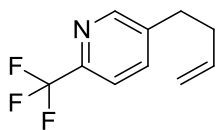

Colorless oil.  $^1\text{H}$  NMR (400 MHz,  $\text{CDCl}_3$ )  $\delta$  8.56 (s, 1H), 7.72–7.65 (m, 1H), 7.61 (d,  $J = 8.0$  Hz, 1H), 5.81 (ddt,  $J = 17.1, 10.4, 6.7$  Hz, 1H), 5.17–4.92 (m, 2H), 2.81 (t,  $J = 7.6$  Hz, 2H), 2.41 (q,  $J = 7.3$  Hz, 2H).  $^{13}\text{C}$  NMR (101 MHz,  $\text{CDCl}_3$ ):  $\delta$  150.2, 140.4, 137.1, 136.5, 120.4, 120.1, 116.3, 77.4, 77.0, 76.7, 34.7, 32.2.  $^{19}\text{F}$  NMR (376 MHz,  $\text{CDCl}_3$ ):  $\delta$  -67.71; IR (neat) 3081, 2931, 2858, 1643, 1400, 1338, 1258, 1177, 1087, 916, 850  $\text{cm}^{-1}$ ; HRMS (EI) calcd for  $\text{C}_{10}\text{H}_{10}\text{F}_3\text{N}$ : 201.0765  $[\text{M}]^+$ ; found: 201.0757.

**1-methyl-4-(propa-1,2-dien-1-yl)benzene (4a):**<sup>7</sup>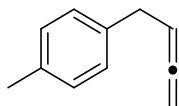

Colorless oil.  $^1\text{H}$  NMR (400 MHz,  $\text{CDCl}_3$ ):  $\delta$  7.13 (s, 4H), 5.31–5.22 (m, 1H), 4.76–4.68 (m, 2H), 2.34 (s, 3H);  $^{13}\text{C}$  NMR (100 MHz,  $\text{CDCl}_3$ ):  $\delta$  208.9, 137.2, 135.7, 129.1, 128.3, 89.7, 75.1, 34.7, 21.1.

**1-ethyl-4-(propa-1,2-dien-1-yl)benzene (4b):**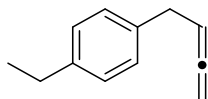

Colorless oil.  $^1\text{H}$  NMR (400 MHz,  $\text{CDCl}_3$ ):  $\delta$  7.19 (s, 4H), 5.36–5.27 (m, 1H), 4.79–4.74 (m, 2H), 3.41–3.35 (m, 2H), 1.28 (t,  $J = 8.0$  Hz, 3H);  $^{13}\text{C}$  NMR (100 MHz,  $\text{CDCl}_3$ ):  $\delta$  208.9, 142.1, 135.7, 128.3, 127.9, 89.7, 74.9, 34.7, 28.4, 15.6; IR (neat) 2956, 2923, 2852, 1956, 1633, 1513, 1463, 1261, 1021, 841  $\text{cm}^{-1}$ ; HRMS (EI) calcd for  $\text{C}_{12}\text{H}_{14}$ : 158.1096  $[\text{M}]^+$ ; found: 158.1094.

**1-(tert-butyl)-4-(propa-1,2-dien-1-yl)benzene (4c):**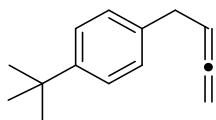

Colorless oil.  $^1\text{H}$  NMR (400 MHz,  $\text{CDCl}_3$ ):  $\delta$  7.32 (d,  $J = 8.0$  Hz, 2H),  $\delta$  7.19 (d,  $J = 8.0$  Hz, 2H), 5.31–5.22 (m, 1H), 4.75–4.69 (m, 2H), 3.36–3.30 (m, 2H), 1.31 (s, 9H);  $^{13}\text{C}$  NMR (100 MHz,  $\text{CDCl}_3$ ):  $\delta$  208.9, 149.1, 137.3, 128.1, 125.3, 89.5, 74.9, 34.6, 34.4, 31.4; IR (neat) 2962, 2929, 2888, 1948, 1633, 1513, 1463, 1266, 1029, 845  $\text{cm}^{-1}$ ; HRMS (EI) calcd for  $\text{C}_{14}\text{H}_{18}$ : 186.1409  $[\text{M}]^+$ ; found: 186.1411.

**4-(propa-1,2-dien-1-yl)-1,1'-biphenyl (4d):**

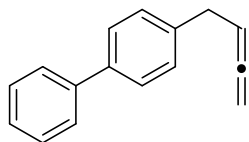

Colorless oil.  $^1\text{H}$  NMR (400 MHz,  $\text{CDCl}_3$ ):  $\delta$  7.67-7.57 (m, 4H), 7.51-7.45 (m, 2H), 7.41-7.34 (m, 3H), 5.41-5.32 (m, 1H), 3.48-3.44 (m, 2H);  $^{13}\text{C}$  NMR (100 MHz,  $\text{CDCl}_3$ ):  $\delta$  209.1, 139.4, 139.2, 128.8, 127.1, 88.4, 75.2, 34.8; IR (neat) 3027, 2978, 1954, 1600, 1486, 1270, 1008, 842  $\text{cm}^{-1}$ ; HRMS (EI) calcd for  $\text{C}_{16}\text{H}_{14}$ : 206.1096  $[\text{M}]^+$ ; found: 206.1099.

**4-(propa-1,2-dien-1-yl)benzonitrile (4g):**

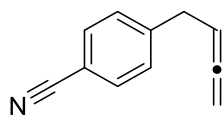

Yellow oil.  $^1\text{H}$  NMR (400 MHz,  $\text{CDCl}_3$ ):  $\delta$  7.61 (d,  $J = 8.0$  Hz, 2H), 7.35 (d,  $J = 8.0$  Hz, 2H), 5.32-5.24 (m, 1H), 4.78-4.74 (m, 2H), 3.44-3.40 (m, 2H);  $^{13}\text{C}$  NMR (100 MHz,  $\text{CDCl}_3$ ):  $\delta$  209.2, 145.7, 132.2, 129.3, 119.1, 110.1, 88.3, 75.8, 35.1; IR (neat) 2922, 2850, 2227, 1948, 1606, 1503, 1401, 1172, 1020, 846  $\text{cm}^{-1}$ ; HRMS (EI) calcd for  $\text{C}_{11}\text{H}_9\text{N}$ : 155.0735  $[\text{M}]^+$ ; found: 155.0730.

**methyl 4-(propa-1,2-dien-1-yl)benzoate (4h):**

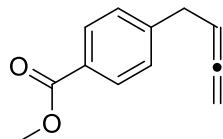

Yellow oil.  $^1\text{H}$  NMR (400 MHz,  $\text{CDCl}_3$ ):  $\delta$  7.99 (d,  $J = 8.0$  Hz, 2H),  $\delta$  7.32 (d,  $J = 8.0$  Hz, 2H), 5.34-5.25 (m, 1H), 4.77-4.73 (m, 2H), 3.93 (s, 3H), 3.45-3.40 (m, 2H);  $^{13}\text{C}$  NMR (100 MHz,  $\text{CDCl}_3$ ):  $\delta$  209.1, 171.1, 167.1, 145.6, 129.7, 128.5, 128.2, 88.8, 75.5, 52.0, 35.0; IR (neat) 2951, 2847, 1955, 1721, 1610, 1434, 1279, 1191, 1110, 1020, 847  $\text{cm}^{-1}$ ; HRMS (EI) calcd for  $\text{C}_{12}\text{H}_{12}\text{O}_2$ : 188.0837  $[\text{M}]^+$ ; found: 188.0831.

**1-(buta-2,3-dien-1-yl)naphthalene (4j):**

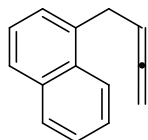

Colorless oil.  $^1\text{H}$  NMR (400 MHz,  $\text{CDCl}_3$ ):  $\delta$  8.25-8.18 (m, 1H), 8.05-7.98 (m, 1H), 7.57-7.50 (m, 2H), 7.48 (d,  $J = 7.3$  Hz, 1H), 7.29 (d,  $J = 7.3$  Hz, 1H), 6.84 (t,  $J = 6.9$  Hz, 1H), 5.18 (d,  $J = 6.9$  Hz, 2H), 2.68 (s, 3H).  $^{13}\text{C}$  NMR (101 MHz,  $\text{CDCl}_3$ ):  $\delta$  210.9, 133.7, 133.0, 130.8, 128.3, 126.6, 125.7, 125.6, 125.1, 124.8, 124.1, 90.5, 77.7, 77.4,



---

77.0, 76.7, 19.6. IR (neat) 3040, 2924, 2854, 1940, 1688, 1515, 1392, 1262, 1096, 830, 753  $\text{cm}^{-1}$ ; HRMS (EI) calcd for  $\text{C}_{14}\text{H}_{12}$ : 180.0939  $[\text{M}]^+$ ; found: 180.0930.

**(E)-1-(4-cyclohexylbut-3-en-1-yl)-4-methylbenzene (5a):**

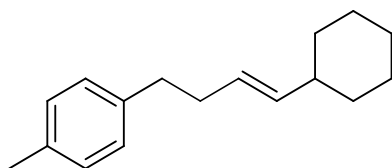

Colorless oil.  $^1\text{H}$  NMR (400 MHz,  $\text{CDCl}_3$ ):  $\delta$  7.07 (s, 4H), 5.38 (d,  $J = 4.5$  Hz, 2H), 2.61 (t,  $J = 7.9$  Hz, 2H), 2.31 (s, 3H), 2.26 (dd,  $J = 8.8, 5.3$  Hz, 2H), 1.88 (tt,  $J = 11.3, 3.9$  Hz, 1H), 1.76–1.65 (m, 4H), 1.32–0.94 (m, 6H).  $^{13}\text{C}$  NMR (101 MHz,  $\text{CDCl}_3$ ):  $\delta$  139.2, 137.1, 135.1, 128.9, 128.4, 126.9, 77.4, 77.1, 76.8, 40.7, 35.9, 34.8, 33.3, 26.3, 26.2, 21.0. IR (neat) 3018, 2924, 2851, 1515, 1448, 1348, 1259, 1108, 1022, 968, 891, 807  $\text{cm}^{-1}$ ; HRMS (EI) calcd for  $\text{C}_{17}\text{H}_{24}$ : 228.1878.  $[\text{M}]^+$ ; found: 228.1871.

## 6. Computational Details

All of the calculations reported here were performed with the Gaussian16 program<sup>7</sup>. The molecular geometries were optimized using B3LYP exchange-correlation functional. The 6-31G(d, p) basis set was used for all atoms except for Pd, for which LANL2DZ is used. During the calculation, analytical vibration frequencies were calculated to determine the nature of the located stationary point. Then, the electronic energies were further refined with single point energy calculations with M06-2X functional and higher basis sets SDD for Pd and 6-311G(d, p) for other atoms. Solvent effects were taken into account using SMD model<sup>9</sup> for the single point energy calculations. Total free energy is the sum of the single point energy in the liquid phase, thermal correction to gibbs free energy with the correction factor 0.9838<sup>10</sup> for zero-point energy and a concentration correction which is 1.89 kcal/mol from  $P = 1$  atm to  $C = 1$  mol/L condition in the solvent at 298.15K.

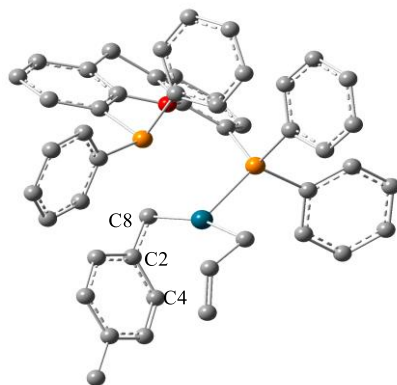

Table S2 The calculated bond order of **B'**.

| Bond  | Mayer bond order | Wiberg bond order | Fuzzy bond order |
|-------|------------------|-------------------|------------------|
| Pd-C2 | 0.03             | 0.17              | 0.23             |
| Pd-C4 | 0.04             | 0.29              | 0.46             |
| Pd-C8 | 0.38             | 0.72              | 0.89             |

## 7. Cartesian Coordinates of the Computed Structures

**B**

|    |             |             |             |
|----|-------------|-------------|-------------|
| C  | 0.95840900  | 5.03970000  | 0.14445100  |
| C  | 1.04014000  | 3.77865200  | 0.72720200  |
| C  | -0.27933500 | 5.64518100  | -0.11659000 |
| C  | -0.11837200 | 3.05123700  | 1.08952600  |
| C  | -1.36046700 | 3.67619700  | 0.82728700  |
| C  | -1.43522700 | 4.93653600  | 0.24430600  |
| H  | -2.41097900 | 5.38607400  | 0.07080400  |
| C  | -0.03656500 | 1.70171800  | 1.66495600  |
| H  | -0.90285400 | 1.41652000  | 2.25887300  |
| Pd | -0.00867800 | 0.66077900  | -0.25122200 |
| P  | 2.17836500  | -0.23861500 | 0.06832800  |
| P  | -2.10414300 | -0.44770100 | 0.12693100  |
| C  | -3.71265400 | 0.38396600  | -0.25080800 |
| C  | -3.68164100 | 1.49350600  | -1.10865800 |
| C  | -4.94750300 | -0.03257200 | 0.27863000  |
| C  | -4.86176100 | 2.16371100  | -1.44151600 |
| H  | -2.73424700 | 1.83151000  | -1.51784400 |
| C  | -6.12258000 | 0.64255600  | -0.05104200 |
| H  | -4.98923100 | -0.87952800 | 0.95637800  |
| C  | -6.08180900 | 1.74150100  | -0.91381300 |
| H  | -4.82079800 | 3.01967400  | -2.10898200 |
| H  | -7.06945800 | 0.31202600  | 0.36696600  |
| H  | -6.99805100 | 2.26740900  | -1.16758200 |
| C  | -2.19718500 | -2.02944600 | -0.84423400 |
| C  | -3.37007600 | -2.44691400 | -1.49240100 |
| C  | -1.05211900 | -2.82671900 | -1.02429900 |
| C  | -3.39866700 | -3.59821100 | -2.27907500 |
| H  | -4.27074600 | -1.85293200 | -1.39449900 |
| C  | -1.06231400 | -3.99364500 | -1.79605300 |
| C  | -2.24699600 | -4.36746200 | -2.43081700 |
| H  | -4.31980000 | -3.89022500 | -2.77403300 |
| H  | -2.26196100 | -5.26643500 | -3.04180600 |
| C  | 3.67194200  | 0.74200200  | -0.41834900 |
| C  | 4.96541900  | 0.49018800  | 0.07230900  |
| C  | 3.48923000  | 1.79352100  | -1.32866600 |
| C  | 6.04608600  | 1.26657400  | -0.34699700 |
| H  | 5.12703700  | -0.30852400 | 0.78932300  |
| C  | 4.57274900  | 2.56545900  | -1.75311100 |
| H  | 2.49043400  | 2.01162100  | -1.69266700 |
| C  | 5.85244400  | 2.30371300  | -1.26306600 |
| H  | 7.03934700  | 1.06206100  | 0.04293300  |
| H  | 4.41249200  | 3.37551400  | -2.45872600 |
| H  | 6.69511400  | 2.90803600  | -1.58688600 |
| C  | 2.58667300  | -0.75798000 | 1.79775000  |
| C  | 2.34042800  | -2.06178900 | 2.25352300  |
| C  | 3.06735900  | 0.19156300  | 2.71690300  |
| C  | 2.57492800  | -2.40776600 | 3.58504400  |
| H  | 1.96688000  | -2.81574200 | 1.56999600  |

|   |             |             |             |
|---|-------------|-------------|-------------|
| C | 3.30412600  | -0.15715500 | 4.04664100  |
| H | 3.27465100  | 1.20630300  | 2.39189100  |
| C | 3.05794300  | -1.45868700 | 4.48649700  |
| H | 2.38271800  | -3.42481500 | 3.91540300  |
| H | 3.68091600  | 0.59142000  | 4.73787300  |
| H | 3.24133100  | -1.73022700 | 5.52206900  |
| H | 0.87692000  | 1.50942600  | 2.22465800  |
| H | -2.27680400 | 3.16075300  | 1.10269400  |
| C | -2.36117100 | -1.02773700 | 1.86877200  |
| C | -2.90697400 | -0.14877300 | 2.82112500  |
| C | -1.94239700 | -2.29627400 | 2.29756600  |
| C | -3.03717800 | -0.53118200 | 4.15634400  |
| H | -3.24937200 | 0.83562500  | 2.51821600  |
| C | -2.07167100 | -2.67642800 | 3.63423400  |
| H | -1.51487500 | -2.99707200 | 1.58997600  |
| C | -2.61914600 | -1.79717300 | 4.56897800  |
| H | -3.46661200 | 0.16330600  | 4.87293000  |
| H | -1.74634800 | -3.66622300 | 3.94257400  |
| H | -2.72017200 | -2.09538700 | 5.60854300  |
| C | 2.38599300  | -1.81875500 | -0.89211900 |
| C | 3.58149400  | -2.13633600 | -1.55610100 |
| C | 1.31415700  | -2.71769500 | -1.04619200 |
| C | 3.70095200  | -3.28546100 | -2.33685100 |
| H | 4.42763300  | -1.46466200 | -1.47716000 |
| C | 1.41633800  | -3.88251400 | -1.81582800 |
| C | 2.61899000  | -4.15309900 | -2.46831600 |
| H | 4.63692300  | -3.49774200 | -2.84437700 |
| H | 2.70324100  | -5.04980900 | -3.07701600 |
| O | 0.12262200  | -2.44297600 | -0.39544800 |
| C | 0.21482600  | -4.79725100 | -1.88017600 |
| H | 0.25352100  | -5.51303500 | -1.04340300 |
| H | 0.23474900  | -5.39544000 | -2.79691700 |
| H | 2.01719200  | 3.34620700  | 0.92701500  |
| H | 1.87453600  | 5.57113100  | -0.10616000 |
| C | -0.36553500 | 7.00184800  | -0.77457700 |
| H | -1.25364500 | 7.55149700  | -0.44583800 |
| H | -0.42554300 | 6.91734300  | -1.86773100 |
| H | 0.51269800  | 7.61471500  | -0.54680200 |
| C | 0.01376200  | 0.21522500  | -2.41935000 |
| H | 0.99107700  | -0.21581800 | -2.64872900 |
| C | -0.17251400 | 1.52440100  | -3.06048100 |
| H | -0.76743800 | -0.49822100 | -2.69246400 |
| C | -1.26048100 | 1.96399200  | -3.72567300 |
| H | -1.30770300 | 2.96496900  | -4.14453200 |
| H | -2.12466400 | 1.32333600  | -3.88717100 |
| H | 0.66446400  | 2.22254500  | -2.97820400 |

**TSB**

|   |            |             |             |
|---|------------|-------------|-------------|
| C | 5.66420100 | -1.66621600 | 0.05365300  |
| C | 4.58666000 | -1.38545800 | -0.77623800 |

|    |             |             |             |           |             |             |             |
|----|-------------|-------------|-------------|-----------|-------------|-------------|-------------|
| C  | 5.59565500  | -2.67326100 | 1.03069300  | H         | -1.24296500 | -2.08510700 | 5.54011300  |
| C  | 3.36955100  | -2.10410700 | -0.67067100 | H         | 2.39107200  | -3.69026000 | 0.42767700  |
| C  | 3.30886000  | -3.11674100 | 0.31874800  | C         | 1.55275900  | 1.38360400  | 1.55308500  |
| C  | 4.39260000  | -3.38800200 | 1.14576700  | C         | 2.31662100  | 0.28122100  | 1.97304800  |
| H  | 4.31009800  | -4.17282300 | 1.89494800  | C         | 1.24648600  | 2.38530700  | 2.48500800  |
| C  | 2.25473500  | -1.83705800 | -1.53900600 | C         | 2.77622300  | 0.19474500  | 3.28654600  |
| Pd | -0.13322200 | -0.53609300 | -1.17806000 | H         | 2.56260600  | -0.50724000 | 1.26931500  |
| P  | -2.26398300 | -0.92461800 | 0.00683700  | C         | 1.69224300  | 2.28675800  | 3.80550600  |
| P  | 0.99320200  | 1.41896700  | -0.21296300 | H         | 0.66355400  | 3.24912100  | 2.18368200  |
| C  | 2.55157100  | 1.87791700  | -1.11180600 | C         | 2.46095200  | 1.19511800  | 4.20929800  |
| C  | 2.56646400  | 1.72943800  | -2.50876400 | H         | 3.37843600  | -0.65883000 | 3.58487400  |
| C  | 3.70384500  | 2.36160000  | -0.47532600 | H         | 1.44168200  | 3.07008200  | 4.51571400  |
| C  | 3.69817800  | 2.06571700  | -3.25134200 | H         | 2.81181600  | 1.12380300  | 5.23510300  |
| H  | 1.68600100  | 1.33567800  | -3.01067800 | C         | -3.58486200 | 0.37898600  | 0.06999300  |
| C  | 4.84198700  | 2.68741600  | -1.21814000 | C         | -4.95576600 | 0.15728100  | -0.13443500 |
| H  | 3.71682500  | 2.48185800  | 0.60274300  | C         | -3.17995000 | 1.70718800  | 0.27325200  |
| C  | 4.84255900  | 2.54261900  | -2.60604400 | C         | -5.85924700 | 1.22115300  | -0.17819900 |
| H  | 3.69019500  | 1.94611900  | -4.33116300 | H         | -5.31756900 | -0.85398900 | -0.27969100 |
| H  | 5.72825700  | 3.05527000  | -0.70833600 | C         | -4.05949700 | 2.79120100  | 0.22146600  |
| H  | 5.72864600  | 2.79530300  | -3.18154900 | C         | -5.41071700 | 2.53191000  | -0.01682600 |
| C  | 0.07398900  | 3.03417900  | -0.30929100 | H         | -6.91404900 | 1.02454500  | -0.34525500 |
| C  | 0.64578200  | 4.22813900  | -0.77623100 | H         | -6.11168000 | 3.36141500  | -0.06606000 |
| C  | -1.27918300 | 3.08113400  | 0.05905800  | O         | -1.84228900 | 1.91680100  | 0.53916800  |
| C  | -0.10864000 | 5.39718000  | -0.88650200 | C         | -3.49235800 | 4.17609800  | 0.44421500  |
| H  | 1.68930200  | 4.23975100  | -1.06845900 | H         | -3.53553300 | 4.42221000  | 1.51702500  |
| C  | -2.05548000 | 4.24152700  | -0.02810300 | H         | -4.10123800 | 4.92894300  | -0.06766300 |
| C  | -1.45388800 | 5.40150600  | -0.51871200 | H         | 4.66878900  | -0.59698400 | -1.51911300 |
| H  | 0.35594700  | 6.30458500  | -1.26033000 | H         | 6.58193700  | -1.09149500 | -0.05268500 |
| H  | -2.04273900 | 6.31151500  | -0.60314300 | C         | 6.78472000  | -2.99511600 | 1.90326800  |
| C  | -3.22893900 | -2.41600800 | -0.51850900 | H         | 6.47828300  | -3.46953000 | 2.84085800  |
| C  | -3.26810900 | -3.59274400 | 0.24600300  | H         | 7.35697300  | -2.09496600 | 2.15129400  |
| C  | -3.84942100 | -2.42228300 | -1.78189300 | H         | 7.47555200  | -3.68621000 | 1.40206600  |
| C  | -3.91615600 | -4.73380100 | -0.23212100 | C         | -0.70934600 | -1.92377500 | -2.85970500 |
| H  | -2.79504700 | -3.62042200 | 1.22153900  | C         | 0.41678800  | -1.90188900 | -3.72189800 |
| C  | -4.50682700 | -3.55829300 | -2.25249500 | C         | 1.45431100  | -2.81596000 | -3.70118200 |
| H  | -3.82840900 | -1.52912800 | -2.39941900 | H         | 0.52987600  | -1.02695100 | -4.36417100 |
| C  | -4.54087100 | -4.72082500 | -1.47936600 | H         | -0.96791800 | -2.87475200 | -2.39512300 |
| H  | -3.93605700 | -5.63267900 | 0.37803100  | H         | -1.57816900 | -1.34737700 | -3.17528100 |
| H  | -4.98538800 | -3.53648000 | -3.22758300 | H         | 1.34130100  | -3.77984200 | -3.21632800 |
| H  | -5.04684200 | -5.60839800 | -1.84821200 | H         | 2.30304300  | -2.71416400 | -4.36901400 |
| C  | -1.96856700 | -1.25846500 | 1.80323300  | H         | 2.31342700  | -1.04040000 | -2.25472600 |
| C  | -2.96998700 | -1.10454800 | 2.77534900  | H         | 1.34719500  | -2.39960700 | -1.40730700 |
| C  | -0.70227600 | -1.71012600 | 2.20050000  | <b>3a</b> |             |             |             |
| C  | -2.70856800 | -1.40018700 | 4.11314900  | C         | -2.78964800 | -0.08724700 | 0.14438300  |
| H  | -3.95518500 | -0.75119100 | 2.48699700  | C         | -2.02465700 | -1.22139900 | -0.15643300 |
| C  | -0.44363000 | -2.01256400 | 3.53895900  | C         | -0.66909100 | -1.11499100 | -0.46692200 |
| H  | 0.08279800  | -1.80914700 | 1.45608100  | C         | -0.02746700 | 0.12990400  | -0.49084700 |
| C  | -1.44552100 | -1.85745000 | 4.49723900  | C         | -0.79393200 | 1.26486100  | -0.19508500 |
| H  | -3.49147800 | -1.27327600 | 4.85589300  | C         | -2.14916600 | 1.15848300  | 0.11547100  |
| H  | 0.54525300  | -2.35271300 | 3.83124100  | H         | -2.49767700 | -2.20081500 | -0.15382300 |

|    |             |             |             |           |             |             |             |
|----|-------------|-------------|-------------|-----------|-------------|-------------|-------------|
| H  | -0.10199000 | -2.01259700 | -0.70370200 | H         | -6.95908500 | -1.13524600 | -1.67545900 |
| H  | -0.32587200 | 2.24671500  | -0.21776600 | H         | -4.42209000 | 0.50878000  | -4.73588300 |
| H  | -2.72067000 | 2.05816100  | 0.33235800  | H         | -6.65237200 | -0.31482000 | -4.00177100 |
| C  | -4.25147300 | -0.20474200 | 0.50819200  | C         | -2.62498100 | -1.42332600 | 0.95064500  |
| H  | -4.71262900 | -1.07856100 | 0.03780200  | C         | -3.31826700 | -1.02757700 | 2.10431700  |
| H  | -4.81415500 | 0.68164400  | 0.19914600  | C         | -2.26363400 | -2.77312300 | 0.81000500  |
| H  | -4.38498600 | -0.31141000 | 1.59234100  | C         | -3.64833800 | -1.96166800 | 3.08921300  |
| C  | 1.45143500  | 0.24113700  | -0.79062300 | H         | -3.59805900 | 0.01265300  | 2.23820200  |
| H  | 1.65415200  | 1.18519500  | -1.31205900 | C         | -2.60346100 | -3.70694400 | 1.78833400  |
| H  | 1.75799300  | -0.56253900 | -1.47006500 | H         | -1.70170500 | -3.08196100 | -0.06744600 |
| C  | 2.33029200  | 0.17440500  | 0.48388500  | C         | -3.29563100 | -3.30266100 | 2.93224600  |
| H  | 2.14848900  | -0.77436100 | 1.00238400  | H         | -4.18080400 | -1.63891900 | 3.97978400  |
| H  | 2.00511200  | 0.97179800  | 1.16710300  | H         | -2.31783100 | -4.74767400 | 1.66311500  |
| C  | 3.79647300  | 0.32706700  | 0.18685800  | H         | -3.55185500 | -4.02752400 | 3.69986600  |
| H  | 4.08965700  | 1.26487000  | -0.28863100 | C         | 2.62521800  | -1.42325500 | 0.95066200  |
| C  | 4.73319400  | -0.58627300 | 0.44433300  | C         | 2.26384200  | -2.77305700 | 0.81016300  |
| H  | 5.77845200  | -0.41924800 | 0.20082300  | C         | 3.31867200  | -1.02743300 | 2.10420700  |
| H  | 4.48836600  | -1.53606700 | 0.91481300  | C         | 2.60380200  | -3.70681500 | 1.78850400  |
| C  |             |             |             | H         | 1.70179000  | -3.08195300 | -0.06718900 |
| Pd | 0.00000300  | -0.60232300 | -1.17443700 | C         | 3.64888100  | -1.96146200 | 3.08911700  |
| P  | -2.15630600 | -0.26447500 | -0.41521000 | H         | 3.59850300  | 0.01280100  | 2.23798400  |
| P  | 2.15629700  | -0.26447400 | -0.41515900 | C         | 3.29613800  | -3.30246100 | 2.93229100  |
| C  | 3.65752400  | -0.28883400 | -1.50512000 | H         | 2.31814600  | -4.74755100 | 1.66339500  |
| C  | 3.49291400  | 0.15627300  | -2.82718500 | H         | 4.18147900  | -1.63865400 | 3.97958700  |
| C  | 4.91845500  | -0.75611900 | -1.10357200 | H         | 3.55245900  | -4.02727600 | 3.69992400  |
| C  | 4.56593800  | 0.15869800  | -3.71782400 | C         | -2.29020200 | 1.40531300  | 0.39660300  |
| H  | 2.51184600  | 0.49060100  | -3.15567500 | C         | -3.47199100 | 2.16354100  | 0.35071200  |
| C  | 5.98973100  | -0.76566400 | -2.00008900 | C         | -1.18290100 | 1.98924000  | 1.04484100  |
| H  | 5.06443500  | -1.11888500 | -0.09099600 | C         | -3.54613000 | 3.43990800  | 0.90862100  |
| C  | 5.81786600  | -0.30460500 | -3.30620000 | H         | -4.34322200 | 1.75186200  | -0.14650400 |
| H  | 4.42166400  | 0.50942200  | -4.73596400 | C         | -1.24012800 | 3.26532600  | 1.61776000  |
| H  | 6.95882700  | -1.13547600 | -1.67614600 | C         | -2.42975800 | 3.98964300  | 1.53589500  |
| H  | 6.65193800  | -0.31460900 | -4.00227800 | H         | -4.47247400 | 4.00324500  | 0.84866000  |
| C  | 2.29011300  | 1.40533800  | 0.39661600  | H         | -2.47750500 | 4.98455700  | 1.97159400  |
| C  | 3.47188700  | 2.16358500  | 0.35073200  | O         | -0.00004800 | 1.27555600  | 1.12343800  |
| C  | 1.18279100  | 1.98925100  | 1.04484500  | C         | -0.00006400 | 3.77794900  | 2.31441000  |
| C  | 3.54600500  | 3.43996200  | 0.90862700  | H         | -0.00005900 | 3.43327000  | 3.36071600  |
| H  | 4.34313000  | 1.75191000  | -0.14646800 | H         | -0.00007300 | 4.87227300  | 2.34920900  |
| C  | 1.24000300  | 3.26534100  | 1.61775500  |           |             |             |             |
| C  | 2.42962200  | 3.98968000  | 1.53588800  | <b>B'</b> |             |             |             |
| H  | 4.47233800  | 4.00331500  | 0.84865800  | C         | -1.36605200 | 5.23716500  | -0.46686100 |
| H  | 2.47734500  | 4.98459800  | 1.97158200  | C         | -1.77649800 | 4.04495200  | -1.04074100 |
| C  | -3.65766200 | -0.28897900 | -1.50497800 | C         | -0.00335700 | 5.55462100  | -0.32518500 |
| C  | -4.91859900 | -0.75603700 | -1.10319600 | C         | -0.83538500 | 3.08194400  | -1.51570500 |
| C  | -3.49315000 | 0.15587400  | -2.82714500 | C         | 0.54244600  | 3.42893000  | -1.38384800 |
| C  | -5.98998300 | -0.76561100 | -1.99958300 | C         | 0.93504100  | 4.63384500  | -0.81781500 |
| H  | -5.06449200 | -1.11862600 | -0.09054200 | H         | 1.99529300  | 4.86702300  | -0.74495300 |
| C  | -4.56627800 | 0.15826600  | -3.71765800 | C         | -1.24831100 | 1.77294200  | -1.96028700 |
| H  | -2.51207300 | 0.49001900  | -3.15579200 | H         | -0.52789500 | 1.19242200  | -2.53337700 |
| C  | -5.81821400 | -0.30480500 | -3.30579600 | Pd        | -1.04723800 | 1.39357500  | 0.18479700  |

|   |             |             |             |             |             |             |             |
|---|-------------|-------------|-------------|-------------|-------------|-------------|-------------|
| P | 2.29469900  | -0.36193000 | 0.26752900  | H           | -2.13250200 | -0.72800600 | 3.10148500  |
| P | -2.11819900 | -0.63226600 | 0.20532700  | C           | -0.88533600 | -4.20591900 | 1.94445000  |
| C | -3.91016900 | -0.41065000 | 0.61786300  | H           | -1.09345200 | -3.46475600 | -0.05831600 |
| C | -4.46983500 | 0.87286700  | 0.54482100  | C           | -1.02296600 | -3.93306700 | 3.30477800  |
| C | -4.72644600 | -1.48545800 | 1.00921100  | H           | -1.58548100 | -2.45369600 | 4.77242700  |
| C | -5.81792400 | 1.07880600  | 0.84542700  | H           | -0.53377600 | -5.17965600 | 1.61604900  |
| H | -3.83381000 | 1.70852700  | 0.26628800  | H           | -0.78291500 | -4.69448700 | 4.04133600  |
| C | -6.07256200 | -1.27825800 | 1.31046100  | C           | 2.48390000  | -0.85823100 | -1.51166600 |
| H | -4.30807300 | -2.48441800 | 1.08356000  | C           | 3.65894900  | -0.66021500 | -2.25103200 |
| C | -6.62122200 | 0.00409300  | 1.22817300  | C           | 1.38990300  | -1.44046000 | -2.18232600 |
| H | -6.23586500 | 2.07988000  | 0.78861600  | C           | 3.74733600  | -1.03187700 | -3.59337000 |
| H | -6.69185200 | -2.11775900 | 1.61375600  | H           | 4.51540500  | -0.20486700 | -1.76661300 |
| H | -7.66859300 | 0.16415800  | 1.46820700  | C           | 1.47512100  | -1.87213400 | -3.51018600 |
| C | -2.16309600 | -1.47118500 | -1.44630200 | C           | 2.66156900  | -1.64430700 | -4.21244800 |
| C | -3.37538300 | -1.68351000 | -2.11873400 | H           | 4.66558700  | -0.85688200 | -4.14581700 |
| C | -0.97343200 | -1.78256800 | -2.13646400 | H           | 2.72836200  | -1.96236600 | -5.25001100 |
| C | -3.40739600 | -2.17050200 | -3.42548200 | O           | 0.21706600  | -1.59731200 | -1.46023600 |
| H | -4.30795500 | -1.45027400 | -1.61989900 | C           | 0.31733300  | -2.62332200 | -4.12146000 |
| C | -0.98685500 | -2.27553300 | -3.44586900 | H           | 0.50001000  | -3.70633600 | -4.03401100 |
| C | -2.21631400 | -2.45663600 | -4.08413400 | H           | 0.25260800  | -2.41639100 | -5.19583900 |
| H | -4.36009600 | -2.31857100 | -3.92447900 | H           | -2.11374600 | 5.94384900  | -0.11354500 |
| H | -2.22888800 | -2.83075500 | -5.10485500 | H           | -2.83712400 | 3.83342200  | -1.15138600 |
| C | 3.86590300  | 0.58317400  | 0.56397700  | C           | 0.43041700  | 6.88295600  | 0.24594200  |
| C | 5.09592300  | -0.00185900 | 0.90641800  | H           | 0.47506600  | 7.65680600  | -0.53248500 |
| C | 3.78986600  | 1.98387300  | 0.48049000  | H           | 1.42561600  | 6.82019900  | 0.69648000  |
| C | 6.21961900  | 0.79156100  | 1.14511700  | H           | -0.26518300 | 7.23584900  | 1.01322300  |
| H | 5.17464000  | -1.08111000 | 0.99243500  | C           | -0.72824000 | 1.57386100  | 2.31235700  |
| C | 4.91563600  | 2.77637300  | 0.71109600  | C           | 0.16372200  | 2.72812200  | 2.37856700  |
| H | 2.83931900  | 2.45491800  | 0.24568800  | C           | -0.17901000 | 4.01721200  | 2.60731500  |
| C | 6.13364000  | 2.18174300  | 1.04467500  | H           | -1.70003000 | 1.73854900  | 2.78963900  |
| H | 7.16302900  | 0.32255200  | 1.41159400  | H           | -0.26691000 | 0.64776300  | 2.65727800  |
| H | 4.83772400  | 3.85796900  | 0.64249900  | H           | 1.21996300  | 2.51626600  | 2.20226000  |
| H | 7.00852800  | 2.79752000  | 1.23371700  | H           | 0.56369700  | 4.80750700  | 2.63070600  |
| C | 2.66398300  | -1.95568800 | 1.14262000  | H           | -1.20921100 | 4.30509300  | 2.80395700  |
| C | 2.40685400  | -1.99272500 | 2.52351700  |             |             |             |             |
| C | 3.17774400  | -3.10670200 | 0.52615300  | <b>TSB'</b> |             |             |             |
| C | 2.67795800  | -3.13833800 | 3.27069600  | C           | 2.12449600  | 4.83747600  | 0.28610400  |
| H | 1.98803800  | -1.11855500 | 3.01524900  | C           | 2.34015300  | 3.71615200  | 1.03197100  |
| C | 3.43597000  | -4.25922300 | 1.27233400  | C           | 0.79305800  | 5.28172200  | -0.03597900 |
| H | 3.38297200  | -3.10321400 | -0.53971100 | C           | 1.23721100  | 2.96380200  | 1.59884400  |
| C | 3.19281200  | -4.27668000 | 2.64638100  | C           | -0.06281100 | 3.60279000  | 1.52694000  |
| H | 2.47727200  | -3.14488400 | 4.33829900  | C           | -0.25485600 | 4.73447300  | 0.79271300  |
| H | 3.83487500  | -5.14144900 | 0.77846800  | H           | -1.23817400 | 5.19972100  | 0.75888700  |
| H | 3.39915300  | -5.17201800 | 3.22633800  | C           | 1.43515600  | 1.68548600  | 2.16301000  |
| H | -2.27285300 | 1.66638400  | -2.31203000 | Pd          | 1.23238900  | 1.35012300  | -0.04693900 |
| H | 1.28975500  | 2.73627100  | -1.76196000 | P           | -2.35278700 | -0.17584300 | -0.28499300 |
| C | -1.64782900 | -1.96576300 | 1.39556100  | P           | 2.02858900  | -0.83845700 | -0.22603300 |
| C | -1.77817200 | -1.69807400 | 2.76991800  | C           | 3.83119700  | -0.85137900 | -0.66649000 |
| C | -1.19666000 | -3.23055400 | 0.99460900  | C           | 4.55631200  | 0.34490400  | -0.56876600 |
| C | -1.47182500 | -2.67551600 | 3.71500700  | C           | 4.49403100  | -2.00965200 | -1.10681000 |

|   |             |             |             |            |             |             |             |
|---|-------------|-------------|-------------|------------|-------------|-------------|-------------|
| C | 5.91456300  | 0.38356600  | -0.89235800 | H          | 0.13339600  | -4.49496200 | -4.23933300 |
| H | 4.03981200  | 1.24674900  | -0.25100500 | C          | -2.57994300 | -0.72080800 | 1.47650800  |
| C | 5.84996800  | -1.97025600 | -1.43162300 | C          | -3.74122900 | -0.45940400 | 2.21812600  |
| H | 3.94733200  | -2.94295400 | -1.20065700 | C          | -1.54244300 | -1.42105800 | 2.12378100  |
| C | 6.56355800  | -0.77362500 | -1.32393700 | C          | -3.87129600 | -0.87950800 | 3.54233700  |
| H | 6.46117800  | 1.31924800  | -0.81445200 | H          | -4.55268600 | 0.08627200  | 1.74947900  |
| H | 6.34877300  | -2.87329100 | -1.77252600 | C          | -1.67368800 | -1.89836500 | 3.43298900  |
| H | 7.61861400  | -0.74403700 | -1.58151400 | C          | -2.84286700 | -1.60345100 | 4.13880000  |
| C | 1.99518400  | -1.75984800 | 1.38323200  | H          | -4.77665200 | -0.65417800 | 4.09783700  |
| C | 3.17938200  | -2.11885200 | 2.04330100  | H          | -2.94300500 | -1.95824400 | 5.16174200  |
| C | 0.78069400  | -1.97759600 | 2.06624300  | O          | -0.38409100 | -1.64628100 | 1.39979100  |
| C | 3.16224800  | -2.65622900 | 3.33072800  | C          | -0.58852300 | -2.76771200 | 4.02049600  |
| H | 4.13068400  | -1.96202300 | 1.54965800  | H          | -0.86841900 | -3.82686000 | 3.90296300  |
| C | 0.74335500  | -2.52125500 | 3.35470600  | H          | -0.50742400 | -2.59835900 | 5.10050500  |
| C | 1.94841900  | -2.84827400 | 3.98180500  | H          | 2.96841200  | 5.37758400  | -0.13844500 |
| H | 4.09521400  | -2.91807800 | 3.82037300  | C          | 0.63456100  | 6.70812000  | -0.53411300 |
| H | 1.92300200  | -3.26196600 | 4.98695000  | H          | 0.85194000  | 7.42374500  | 0.26865500  |
| C | -3.76932700 | 1.00994400  | -0.48015300 | H          | -0.38558100 | 6.90258500  | -0.87999000 |
| C | -5.03706700 | 0.66494600  | -0.97423900 | H          | 1.31757400  | 6.92388200  | -1.36206400 |
| C | -3.52101700 | 2.35476100  | -0.15269400 | C          | 0.92951700  | 1.78677000  | -2.18474900 |
| C | -6.02992500 | 1.63552200  | -1.12795700 | C          | 0.12269900  | 2.91102000  | -1.90610800 |
| H | -5.25020000 | -0.36472600 | -1.24274000 | C          | 0.48870600  | 4.27216600  | -1.93132600 |
| C | -4.51702000 | 3.32123000  | -0.29538900 | H          | -0.92389900 | 2.69982400  | -1.68844000 |
| H | -2.53861800 | 2.64673700  | 0.20912300  | H          | 1.45201300  | 4.53188500  | -2.36611200 |
| C | -5.77486900 | 2.96444000  | -0.78608800 | H          | -0.30579800 | 4.97420100  | -2.16158200 |
| H | -7.00476800 | 1.35047300  | -1.51460700 | H          | 0.41776400  | 0.89338500  | -2.53097300 |
| H | -4.30716600 | 4.35476400  | -0.03349200 | H          | 1.90830800  | 1.95479600  | -2.63592400 |
| H | -6.54827300 | 3.71778800  | -0.90705300 | H          | 3.35165900  | 3.36918300  | 1.22860700  |
| C | -2.97494800 | -1.65435200 | -1.21742800 | H          | 2.43493600  | 1.37784600  | 2.45621300  |
| C | -2.71735500 | -1.68562800 | -2.59824300 | H          | 0.62312900  | 1.21399600  | 2.70978400  |
| C | -3.67289500 | -2.72774000 | -0.64280400 |            |             |             |             |
| C | -3.16492300 | -2.74571400 | -3.38613700 | <b>3aa</b> |             |             |             |
| H | -2.15590000 | -0.87632100 | -3.05762100 | C          | -2.46047900 | -0.24337800 | -0.12968700 |
| C | -4.10822500 | -3.79692600 | -1.42917900 | C          | -1.89227700 | 1.05953800  | -0.48693300 |
| H | -3.88156800 | -2.72812700 | 0.42229300  | C          | -0.59438600 | 1.34870300  | -0.31242900 |
| C | -3.86110700 | -3.80643400 | -2.80281900 | C          | 0.42955800  | 0.38649900  | 0.24617600  |
| H | -2.95986800 | -2.74824600 | -4.45296400 | C          | -0.21897300 | -0.92519200 | 0.62820300  |
| H | -4.64692600 | -4.62004800 | -0.96707300 | C          | -1.51958300 | -1.20418400 | 0.45296400  |
| H | -4.20437700 | -4.63672400 | -3.41383300 | H          | -2.56783500 | 1.80432700  | -0.90213800 |
| H | -0.88038400 | 3.16103700  | 2.09166000  | H          | -0.21955000 | 2.33310400  | -0.59004300 |
| C | 1.38189700  | -2.05104800 | -1.46725800 | H          | 0.42928600  | -1.67046100 | 1.08446700  |
| C | 1.48559900  | -1.70854800 | -2.82739100 | H          | -1.91585900 | -2.17131200 | 0.75510100  |
| C | 0.81685800  | -3.28794000 | -1.12837000 | C          | -3.76418200 | -0.53592400 | -0.31599700 |
| C | 1.04333600  | -2.58346000 | -3.81823500 | H          | -4.45225700 | 0.18638100  | -0.74443000 |
| H | 1.93244900  | -0.76173200 | -3.11368200 | H          | -4.17289400 | -1.50437300 | -0.04437100 |
| C | 0.36809700  | -4.16044300 | -2.12264000 | C          | 1.09758800  | 1.01762900  | 1.49381700  |
| H | 0.73191100  | -3.58121900 | -0.08845400 | H          | 1.87346500  | 0.35954500  | 1.89630700  |
| C | 0.48049600  | -3.81316500 | -3.46828100 | H          | 0.35494200  | 1.20209400  | 2.27498300  |
| H | 1.14071200  | -2.30464900 | -4.86387000 | C          | 1.51892200  | 0.15581700  | -0.86845800 |
| H | -0.06981000 | -5.11363000 | -1.84048400 | H          | 1.94158800  | 1.13274300  | -1.13568200 |

---

|   |            |             |             |   |            |             |             |
|---|------------|-------------|-------------|---|------------|-------------|-------------|
| H | 0.99865200 | -0.22339600 | -1.75721000 | H | 4.68307700 | -1.16839600 | -0.12977200 |
| C | 2.63336700 | -0.78637900 | -0.50395400 | H | 4.24855300 | 0.58321300  | -0.53439400 |
| H | 2.35443900 | -1.82858700 | -0.34905500 | H | 1.56984700 | 1.97290700  | 1.23688100  |
| C | 3.91620300 | -0.44109400 | -0.38047500 |   |            |             |             |

## 8. References

- 1 L. Ling, Y. He, X. Zhang, M. Luo and X. Zeng, *Angew. Chem. Int. Ed.*, 2019, **131**, 6626.
- 2 T. Hashimoto, T. Maruyama, T. Yamaguchi, Y. Matsubara and Y. Yamaguchi, *Adv. Synth. Catal.*, 2019, **361**, 4232.
- 3 D. Zhu, L. Lv, C. Li, S. Ung, J. Gao and C. Li, *Angew. Chem. Int. Ed.*, 2018, **57**, 16520.
- 4 S. Chitnis, J. W. LaFortune, H. Cummings, L. L. Liu, R. Andrews and D. Stephan, *Organometallics*, 2018, **37**, 4540.
- 5 R. Bunce and L. Johnson, *Org. Prep. Proced. Int.*, 1999, **31**, 407.
- 6 V. Levin and A. Dilman, *Chem. Commun.*, 2021, **57**, 749.
- 7 S. Wang, Y. Liu and N. Cramer, *Angew. Chem. Int. Ed.*, 2019, **58**, 18136.
- 8 M. frisch, G. trucks, H. schlegel, G. scuseria, M. robb, J. cheeseman, G. Scalmani, V. Barone, B. Mennucci, G. petersson et al., *Gaussian*, 2009, **121**, 150.
- 9 A. Marenich, C. Cramer and D. Trochlear, *J. Phys. Chem. B*, 2009, **113**, 6378.
- 10 J. Merrick, D. Moran and L. Radom, *J. Phys. Chem. A*, 2007, **111**, 11683.



## 9. Copies of $^1\text{H}$ , $^{13}\text{C}$ and $^{19}\text{F}$ NMR Spectra of Products

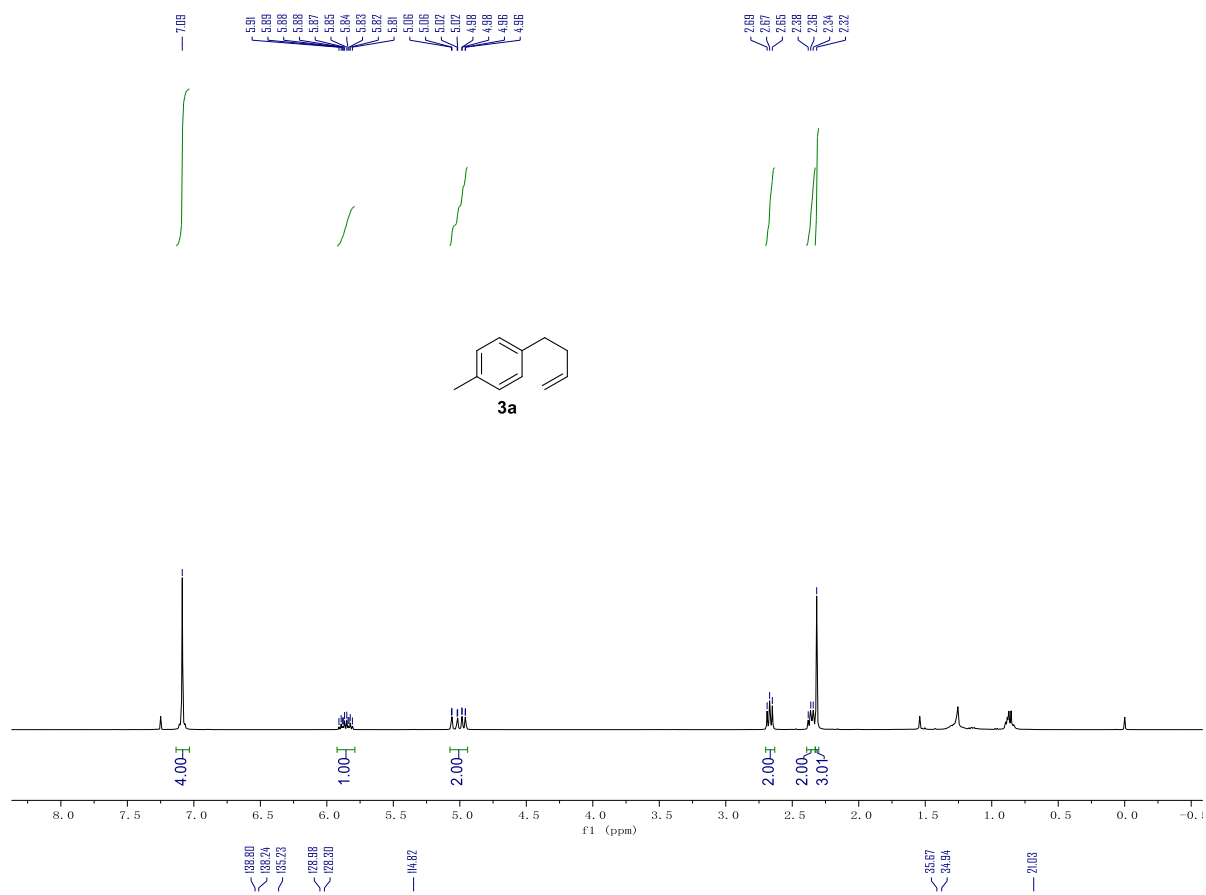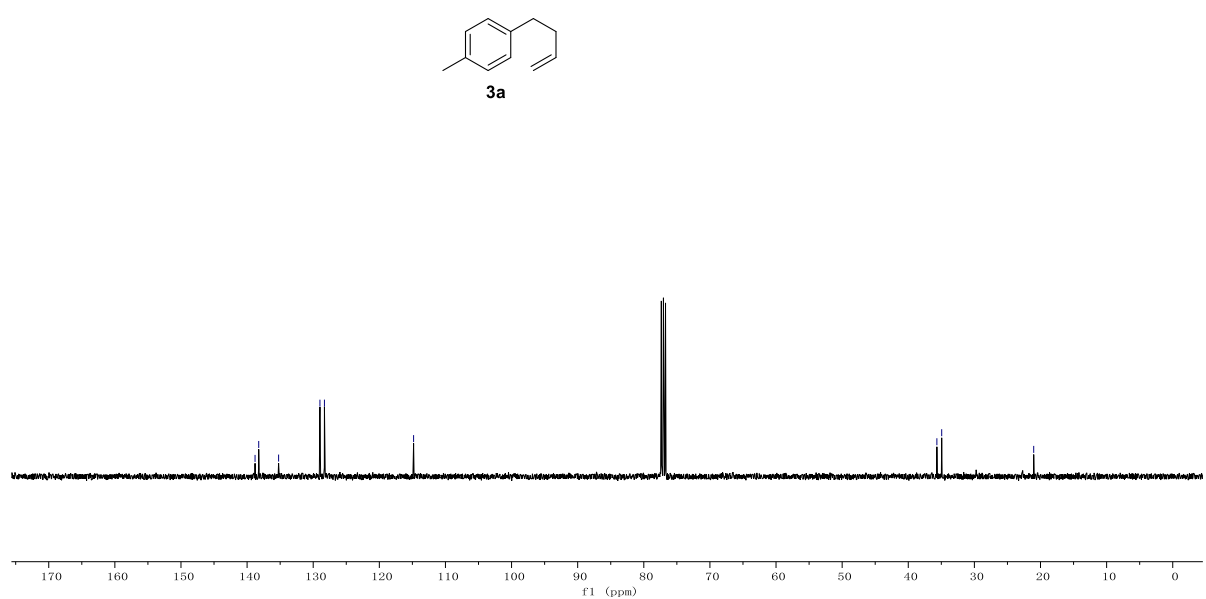

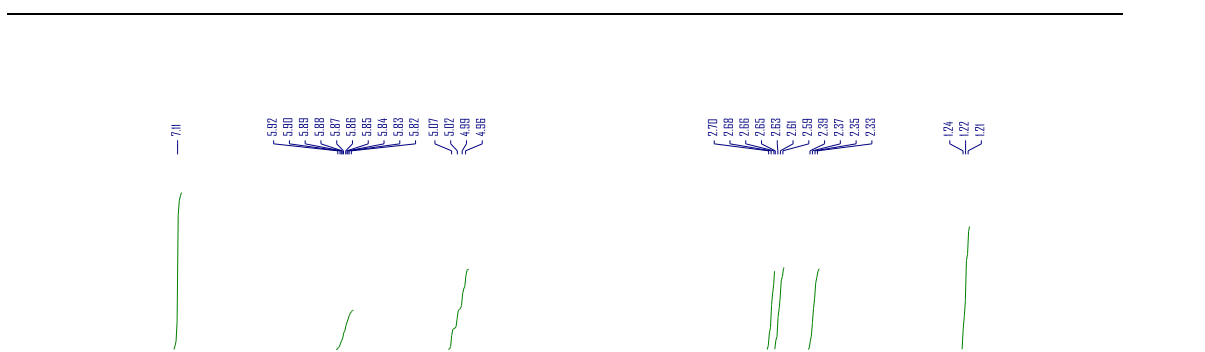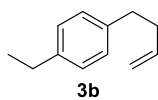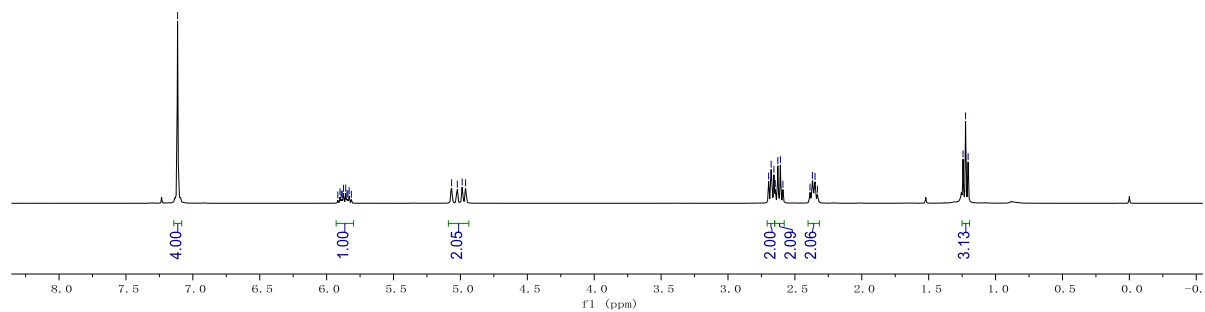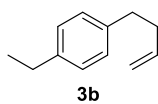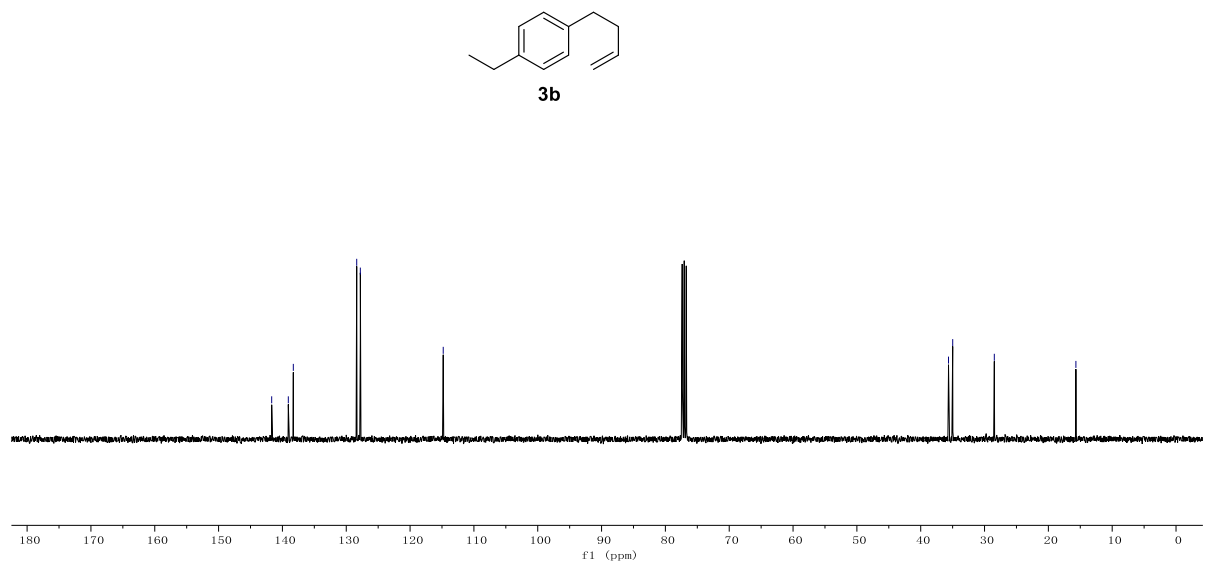

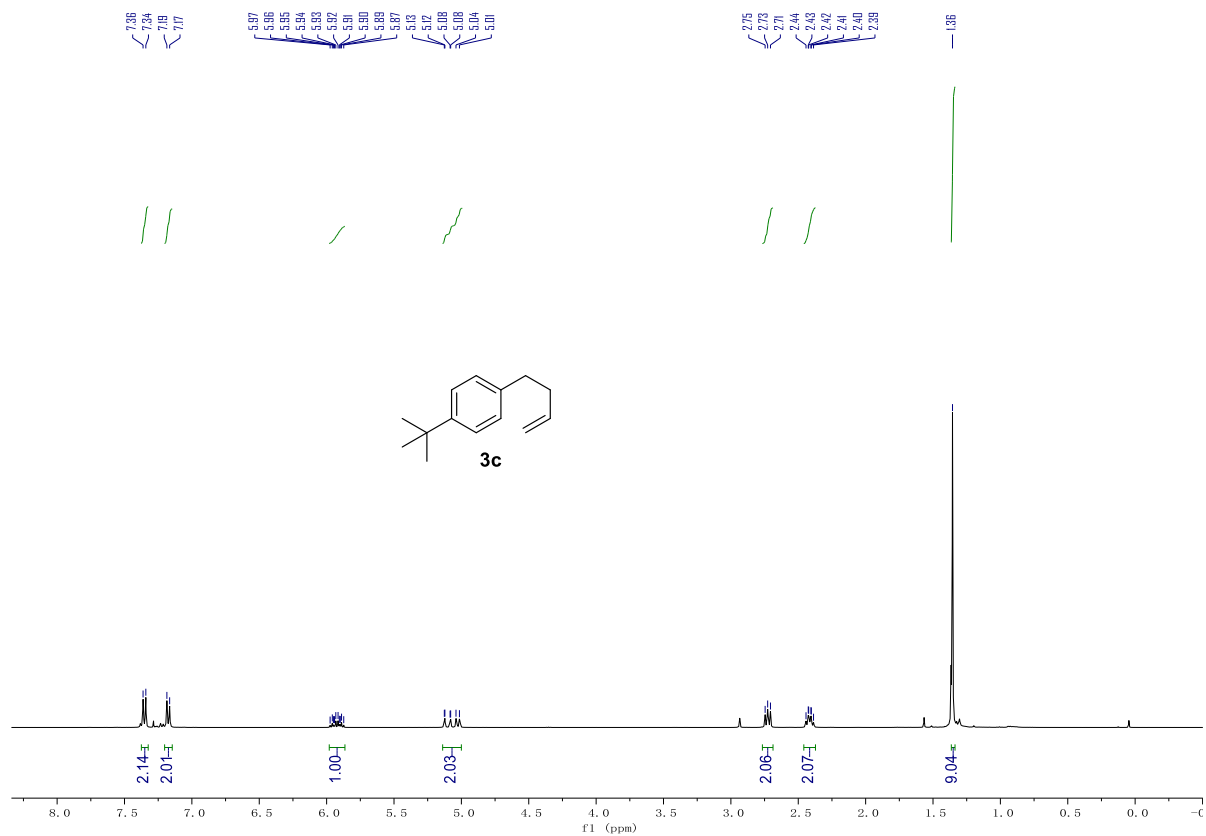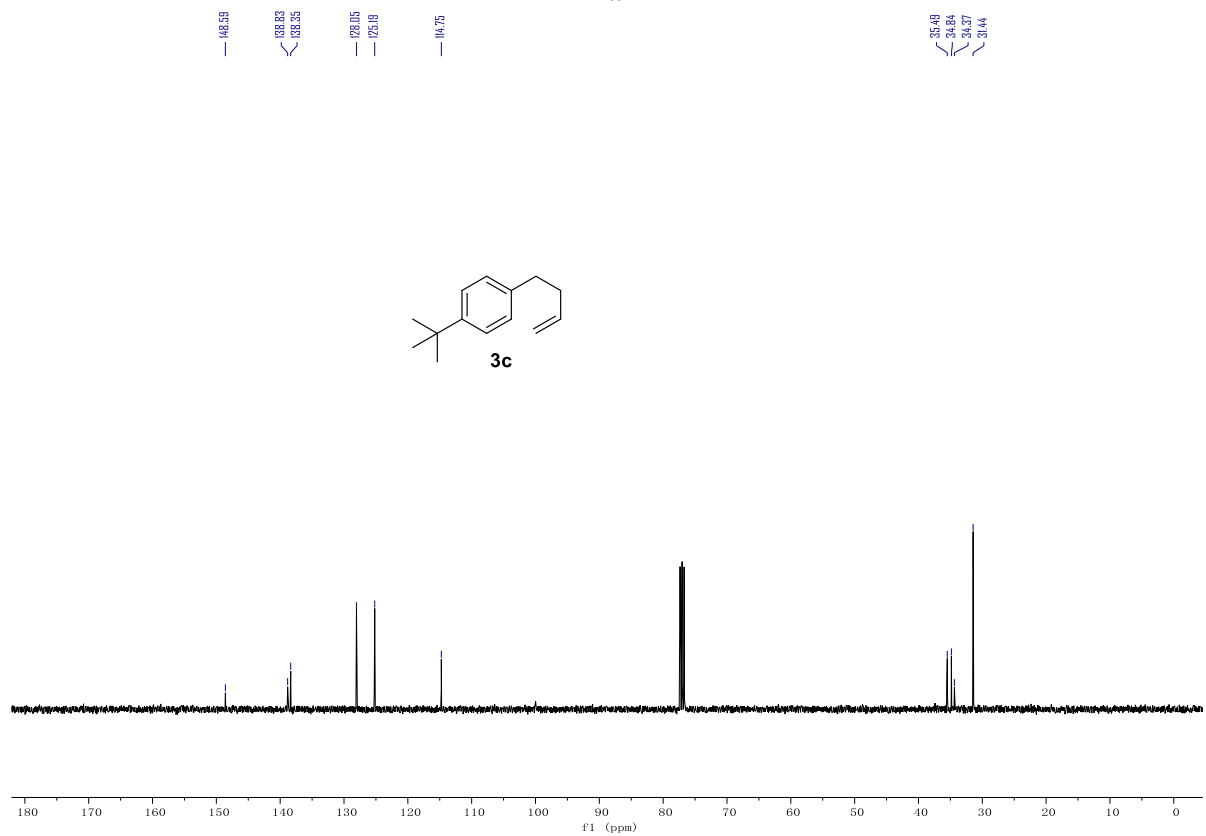

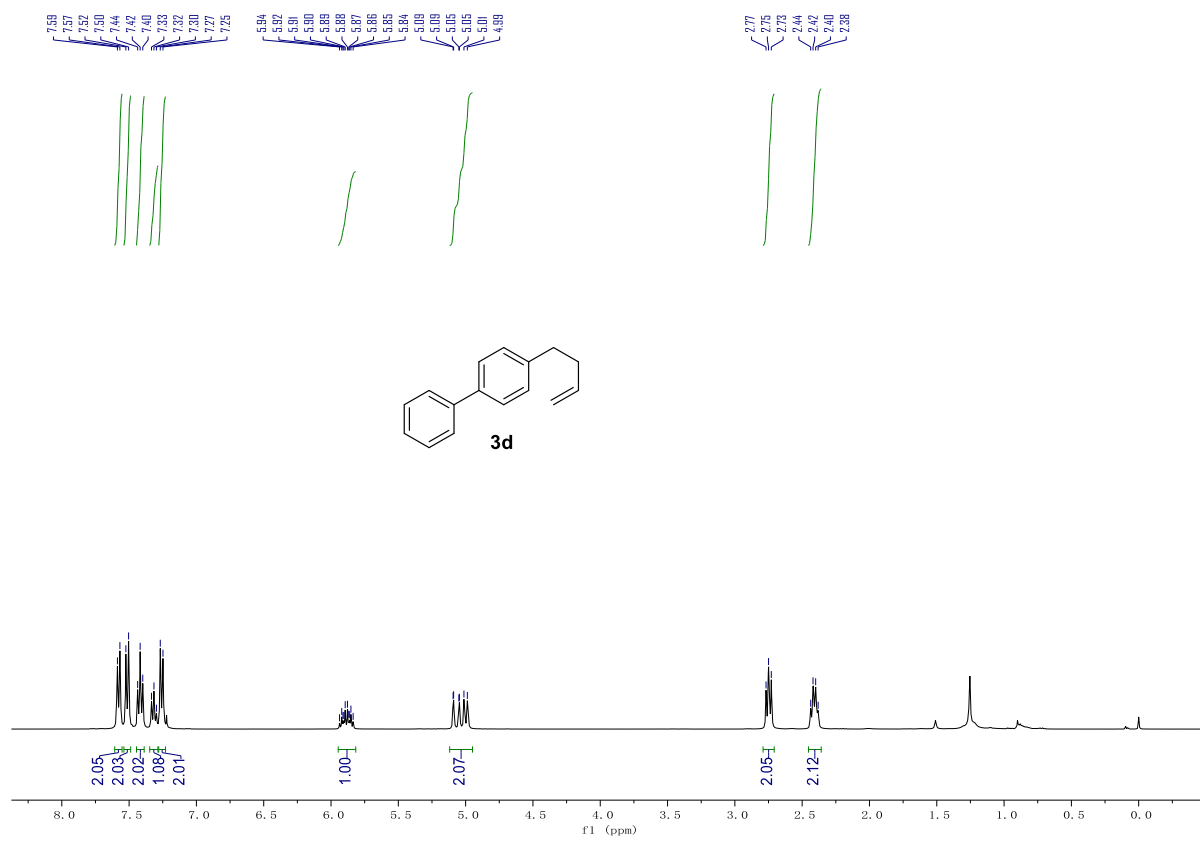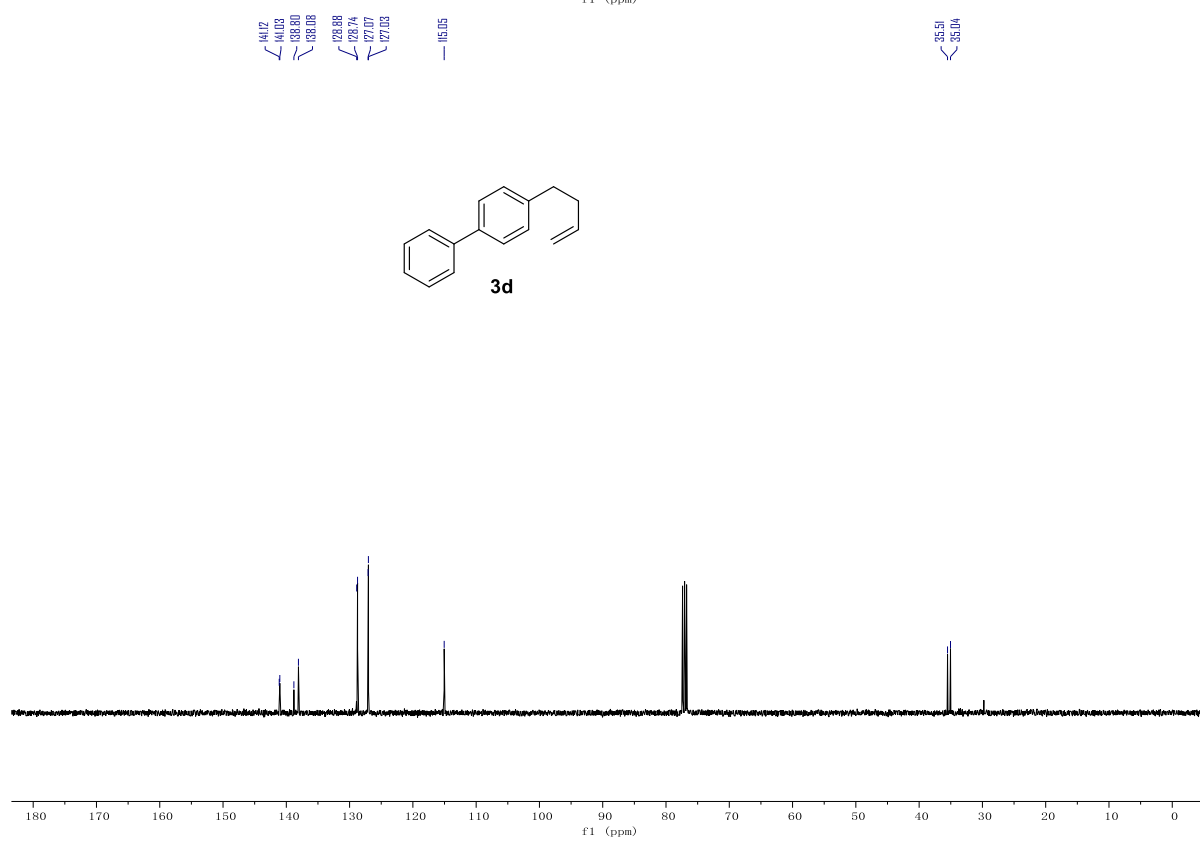

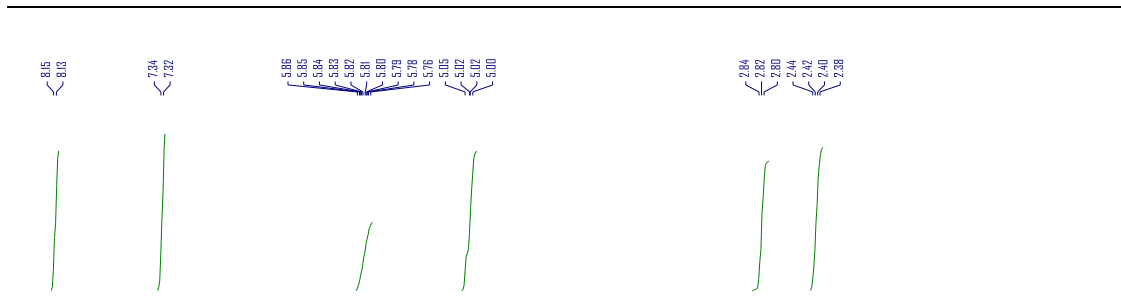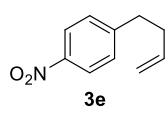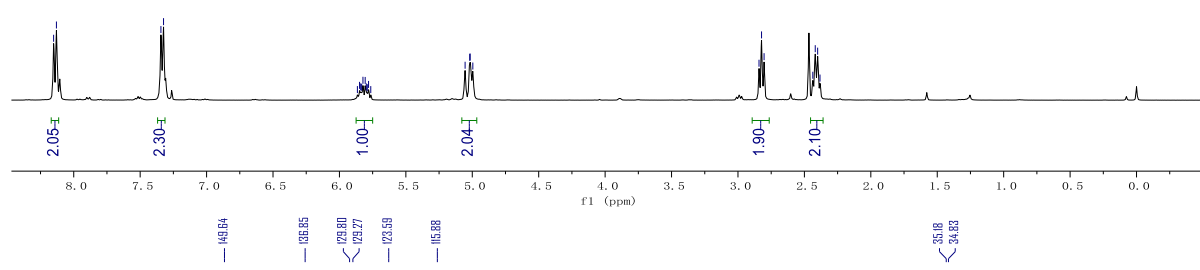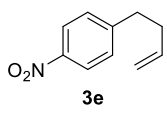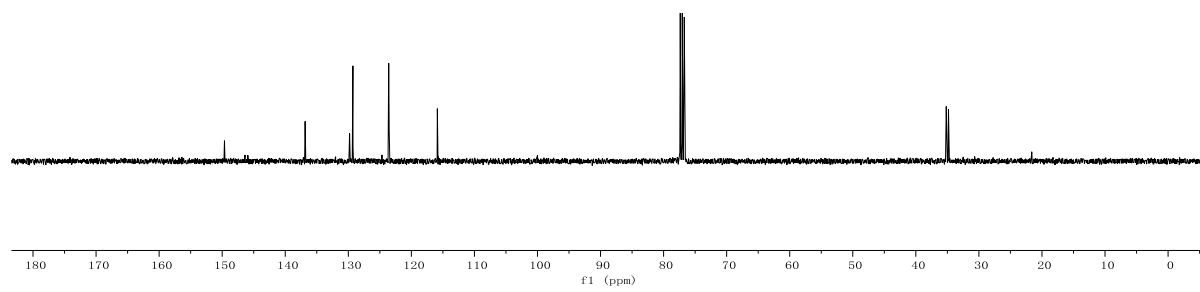

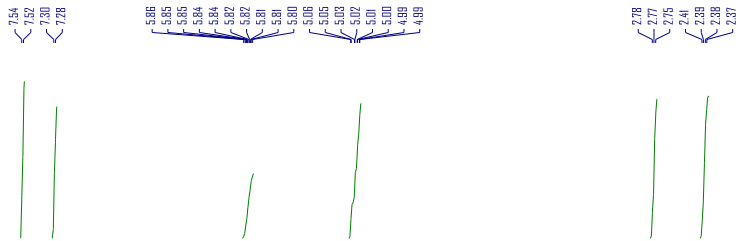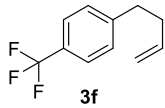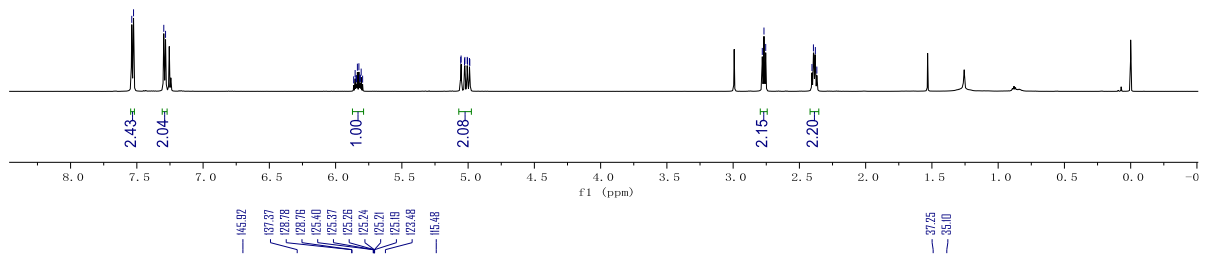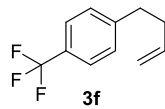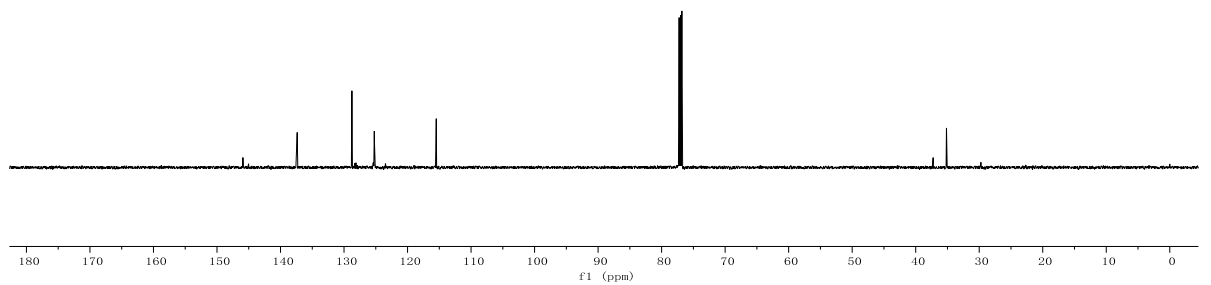

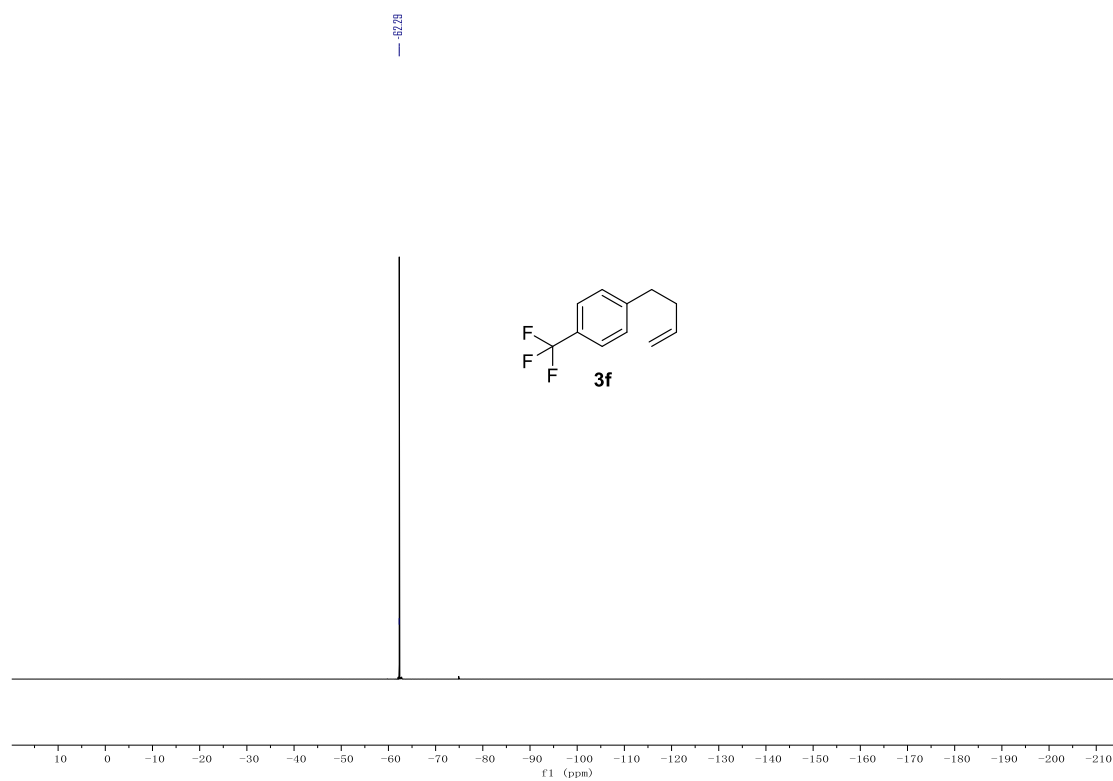

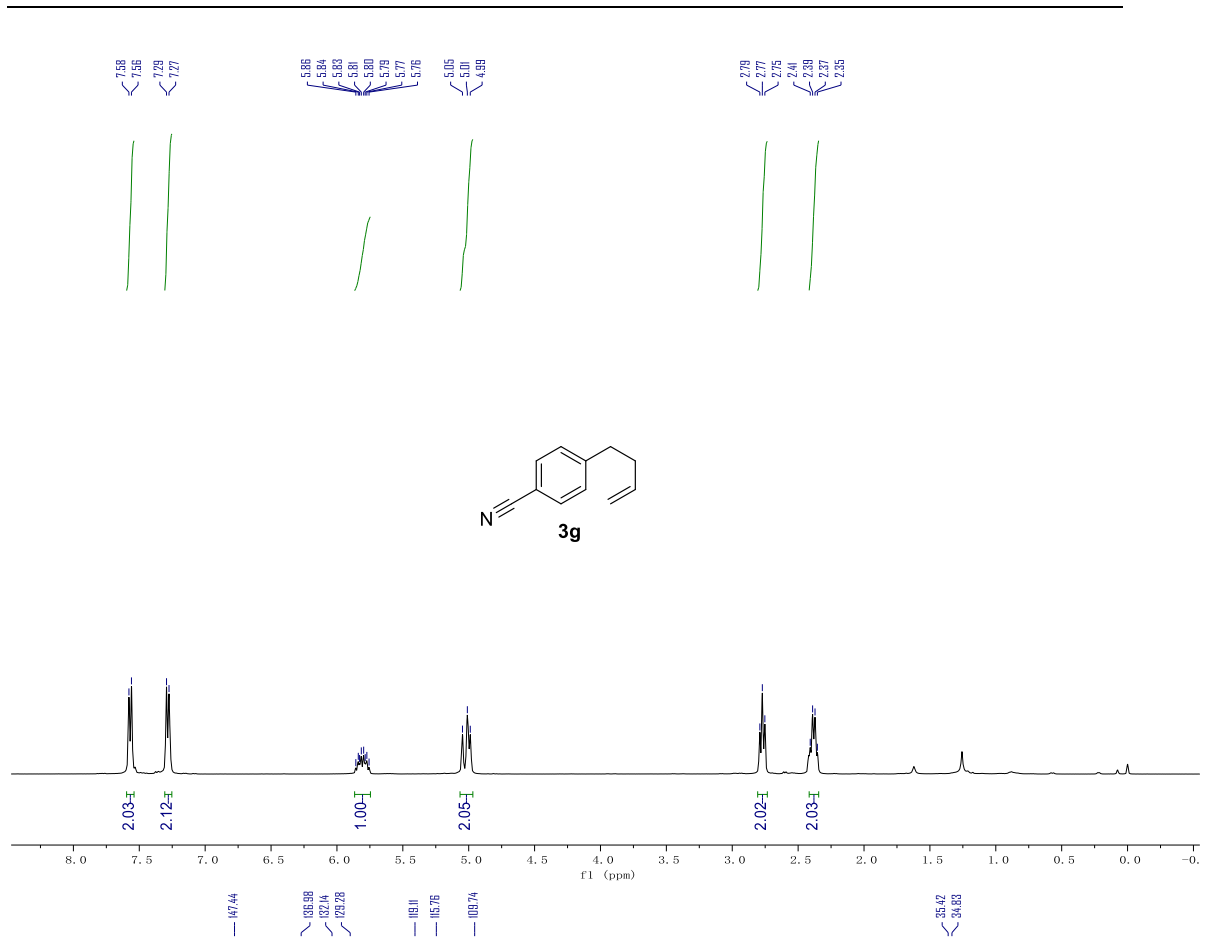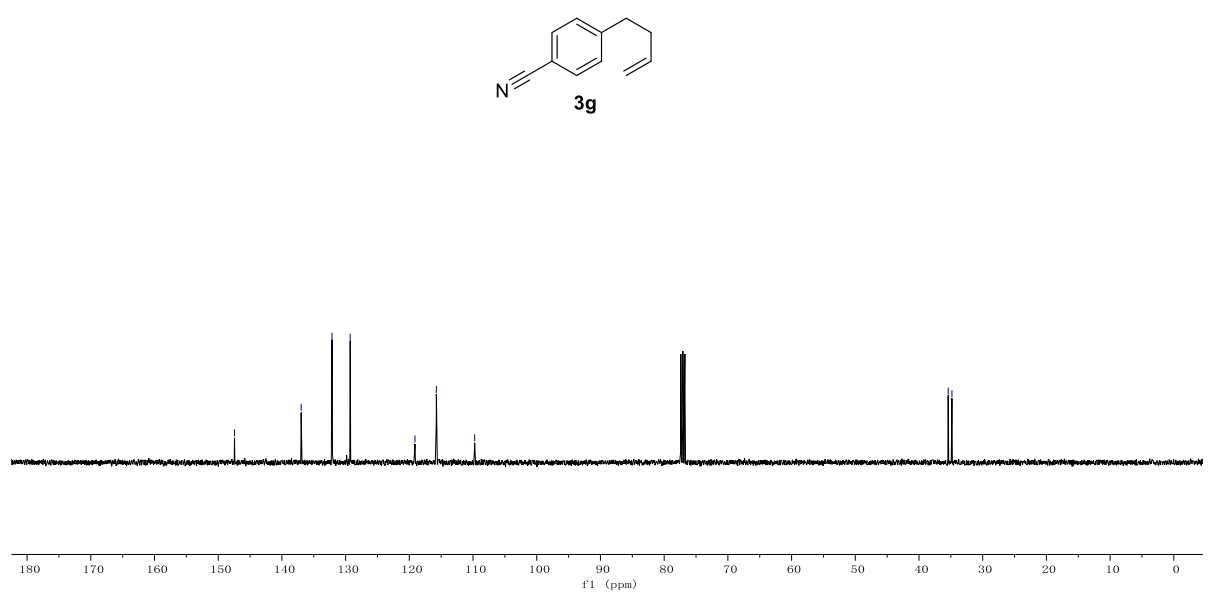



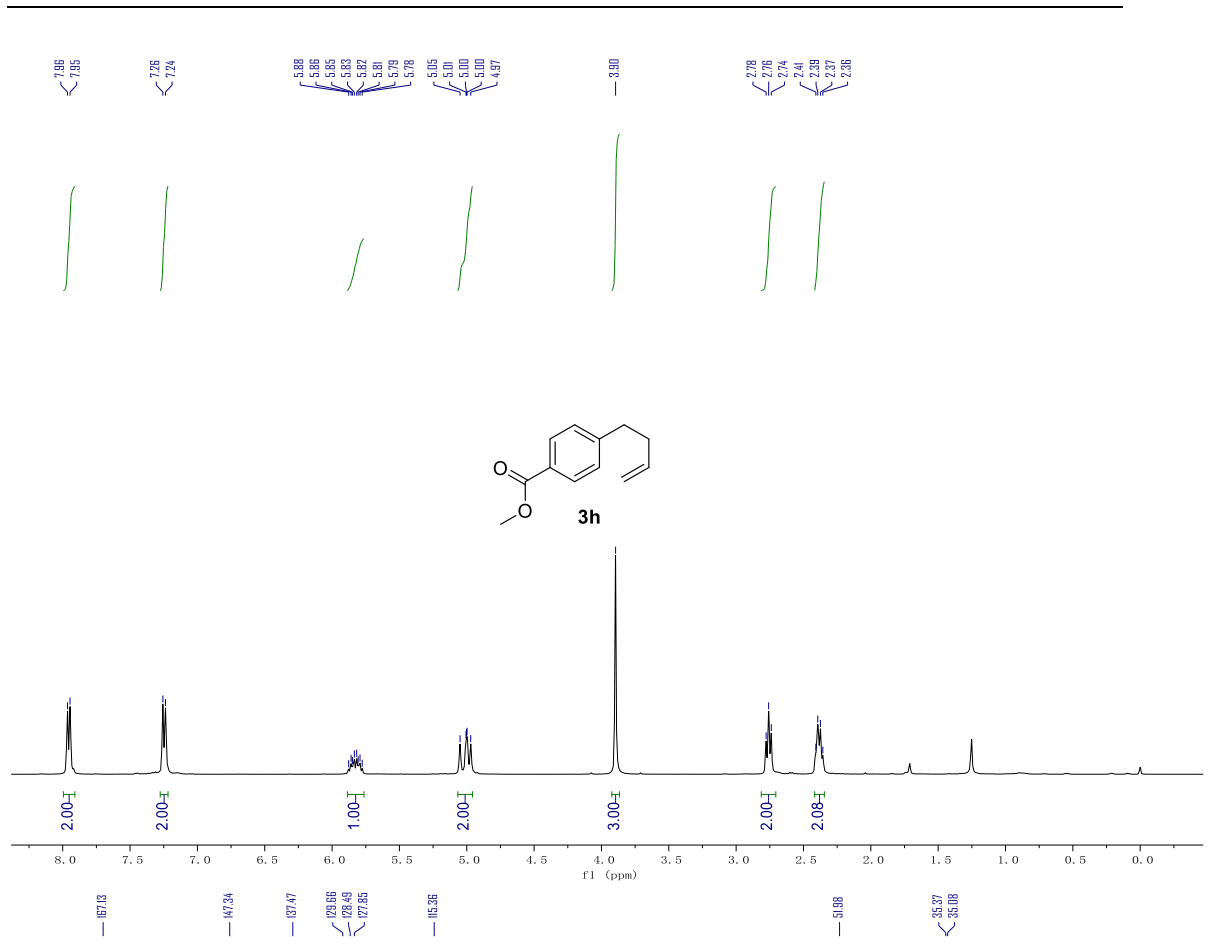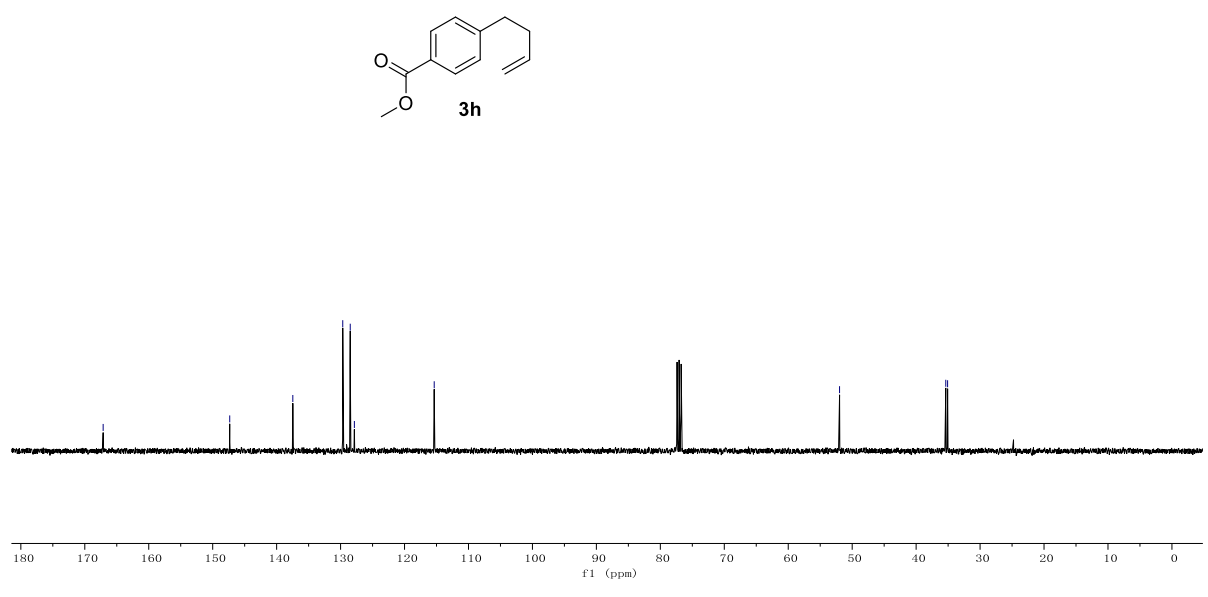

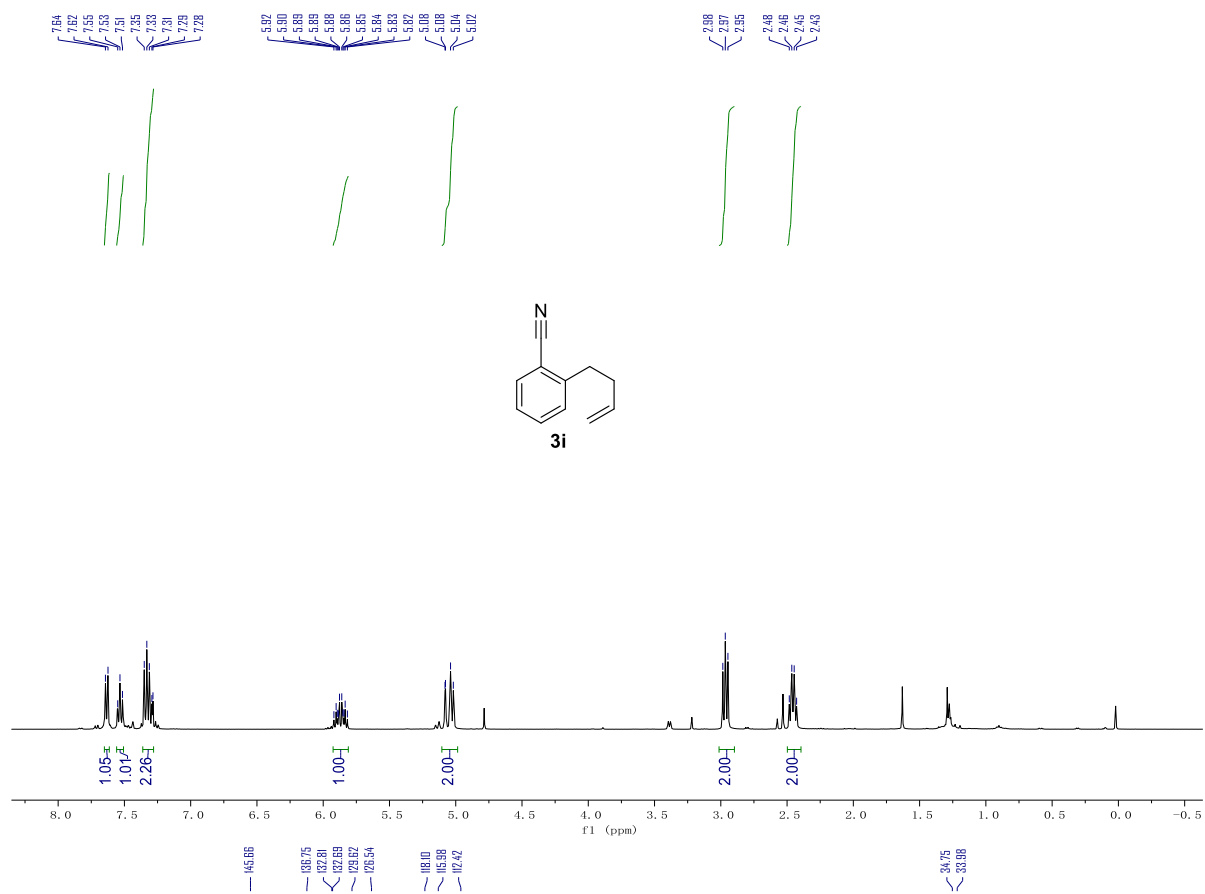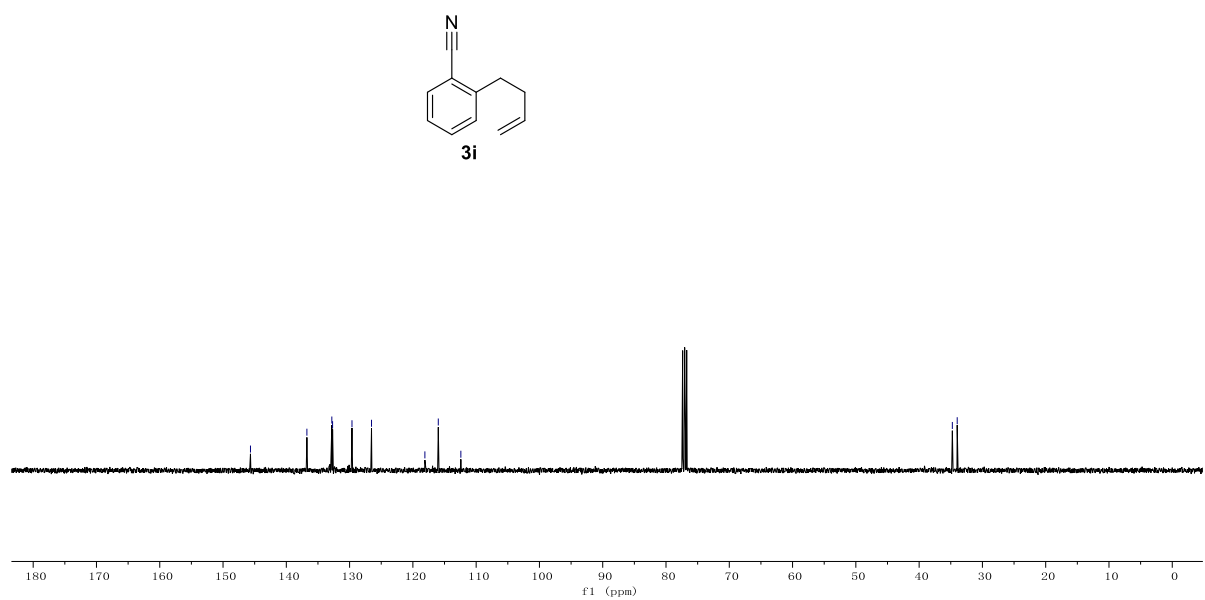

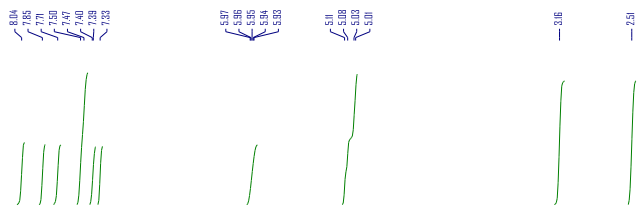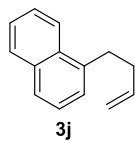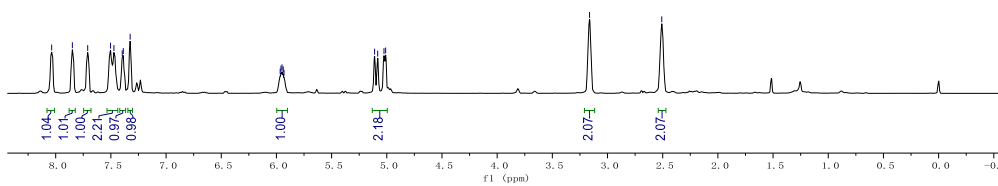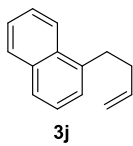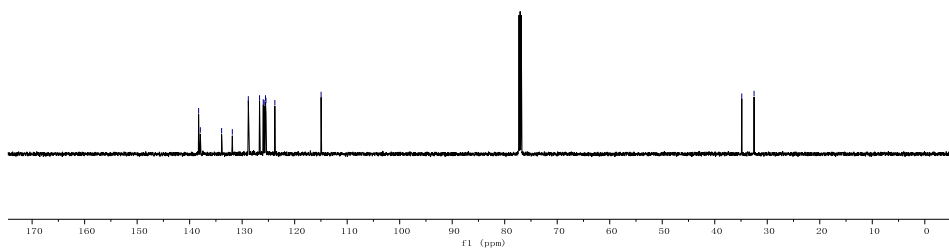

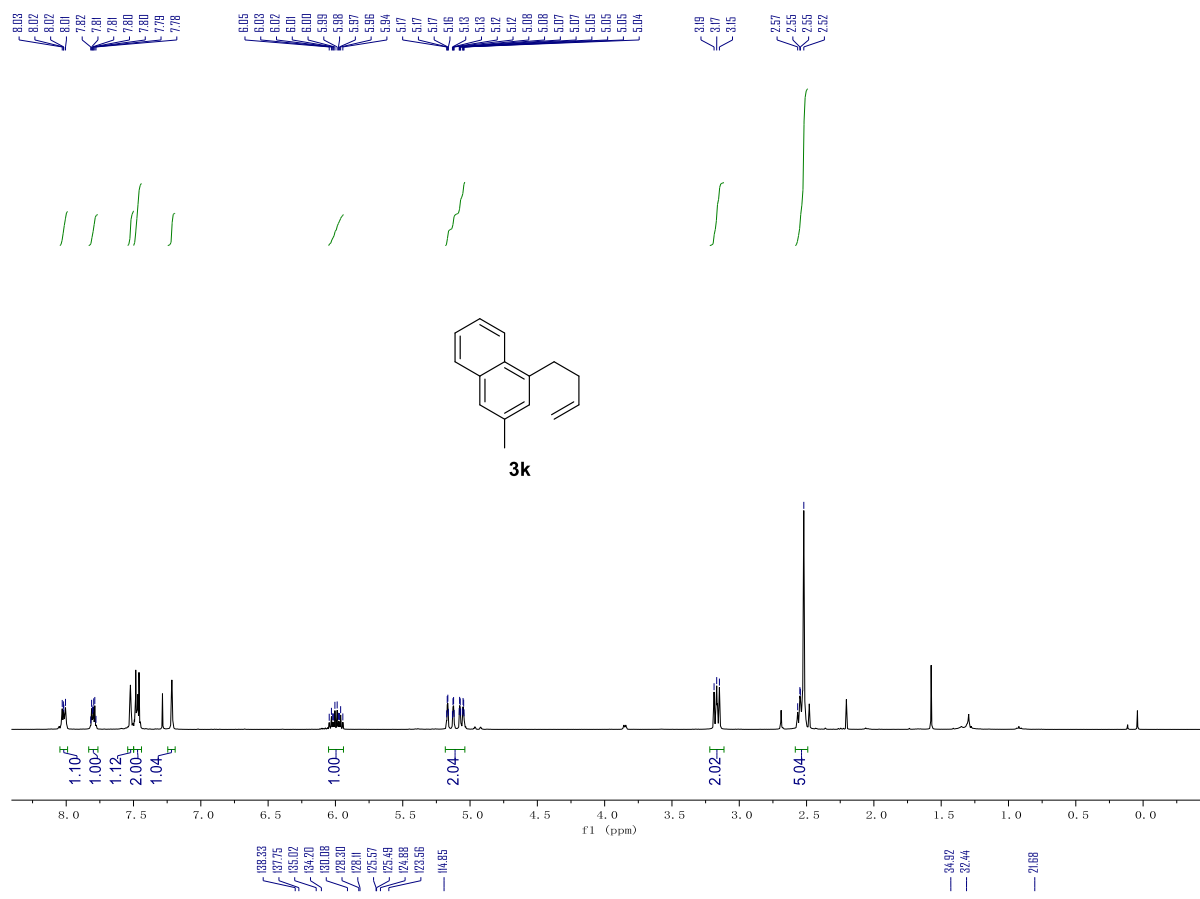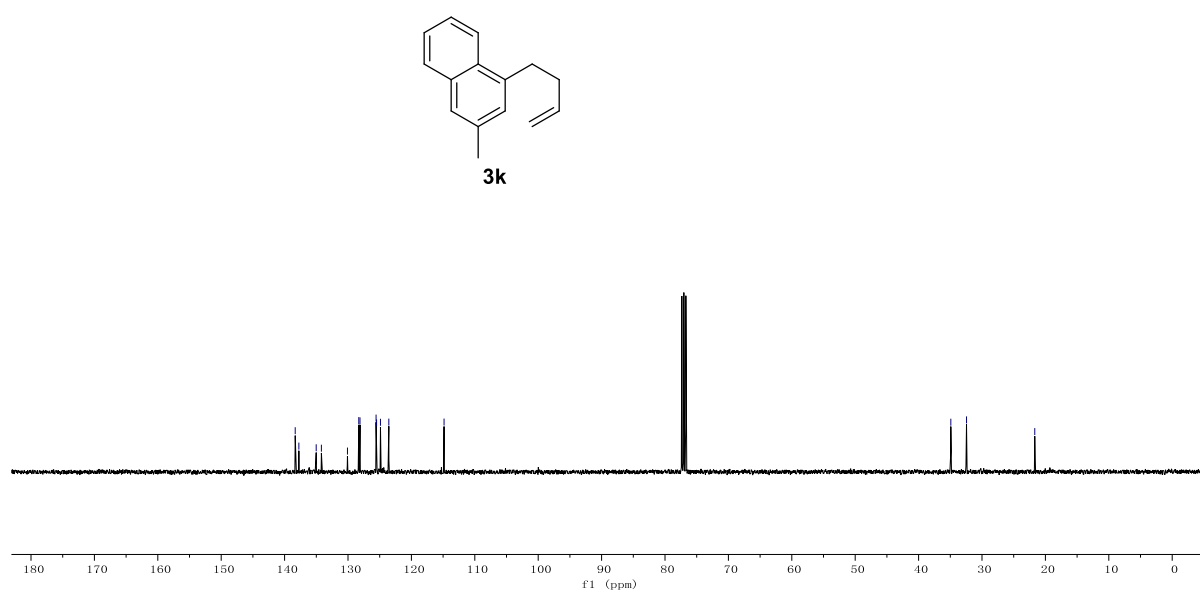

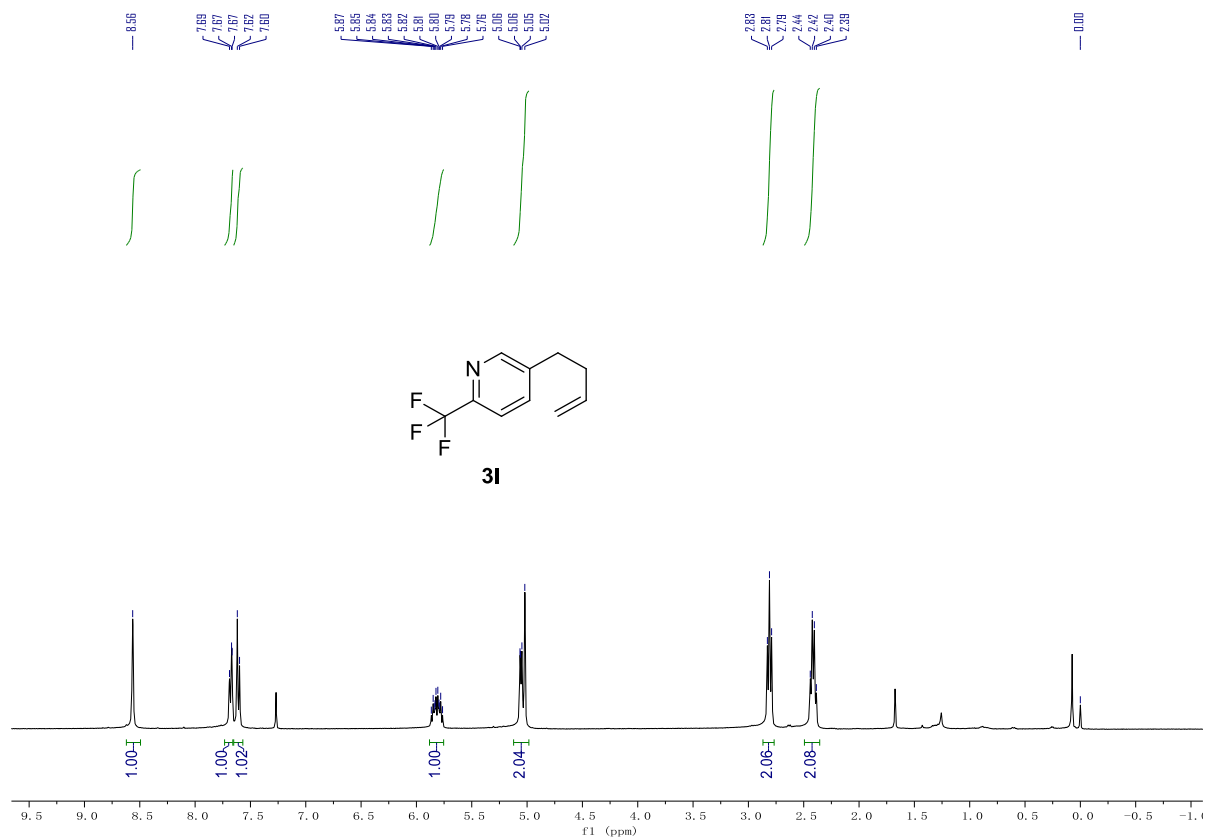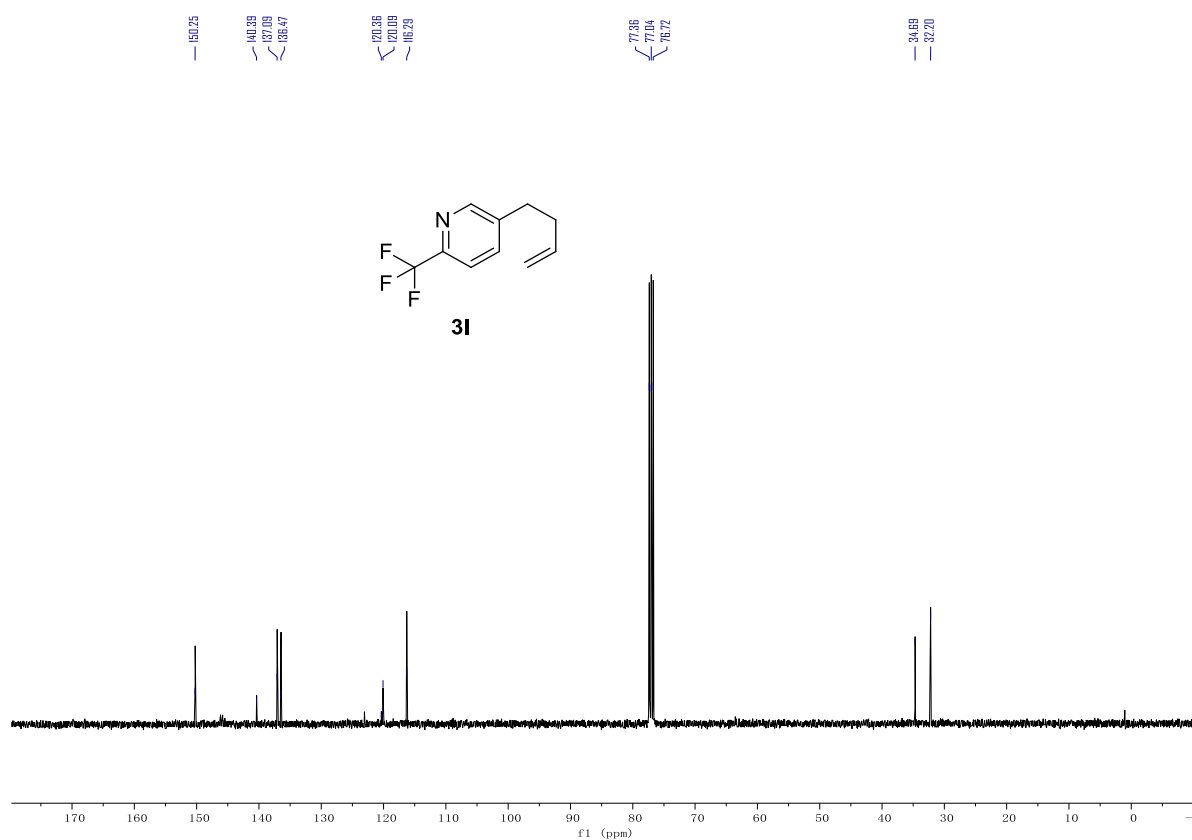

\_\_\_\_\_

— 67.71

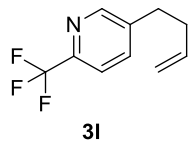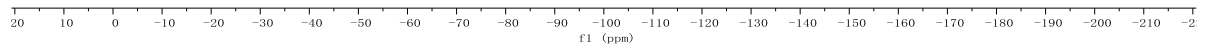

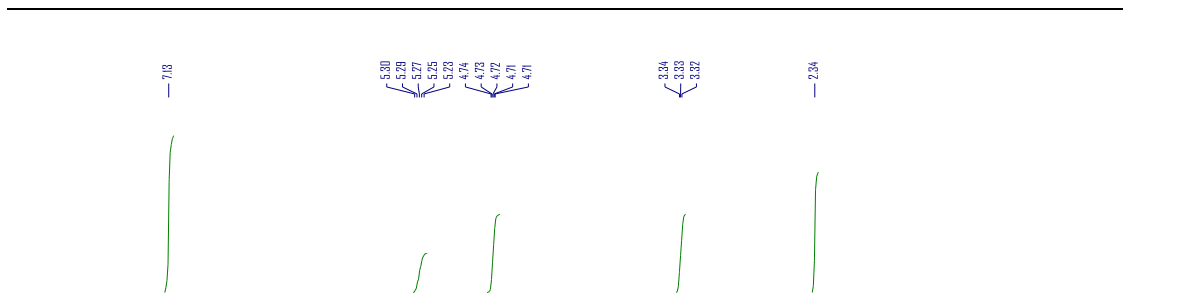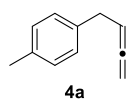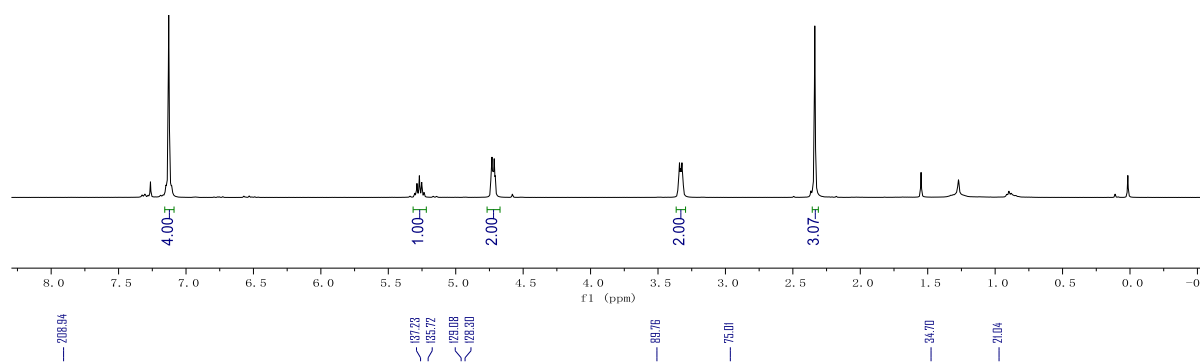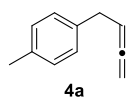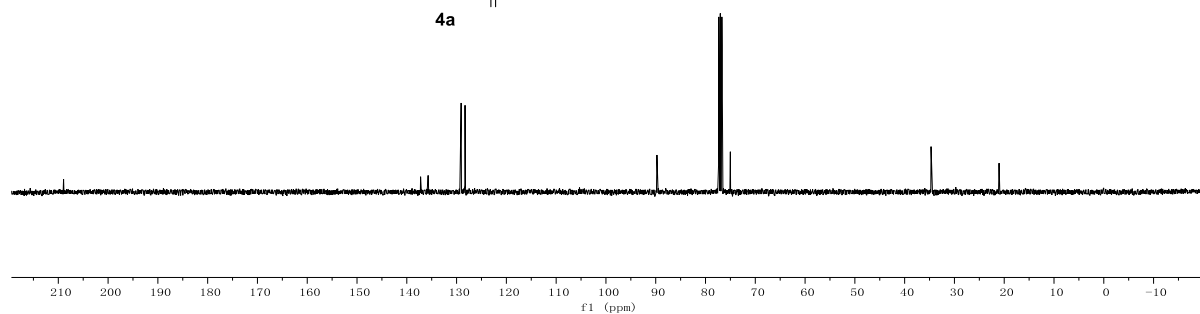

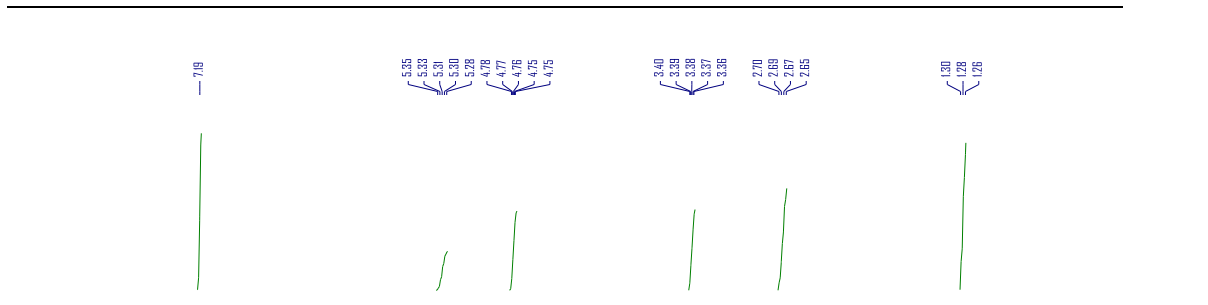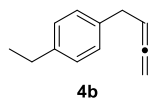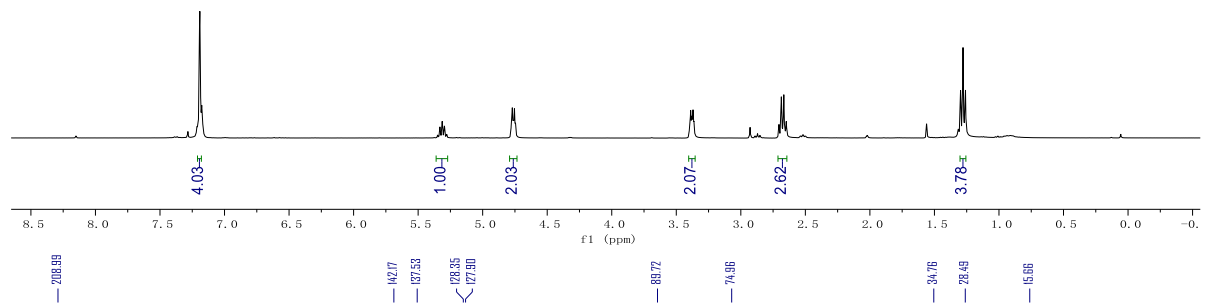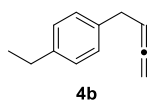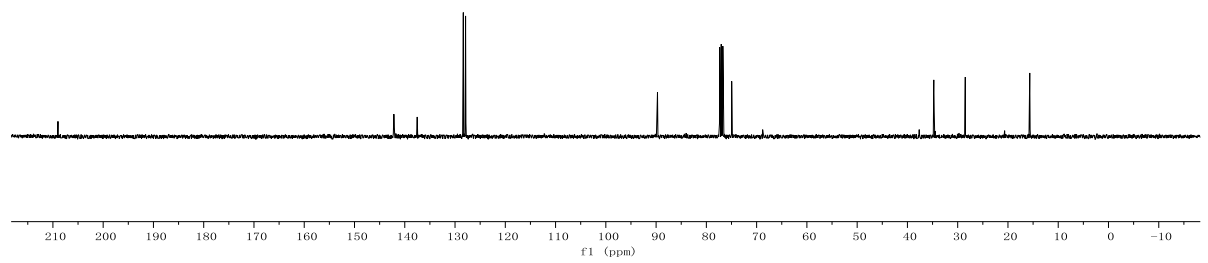



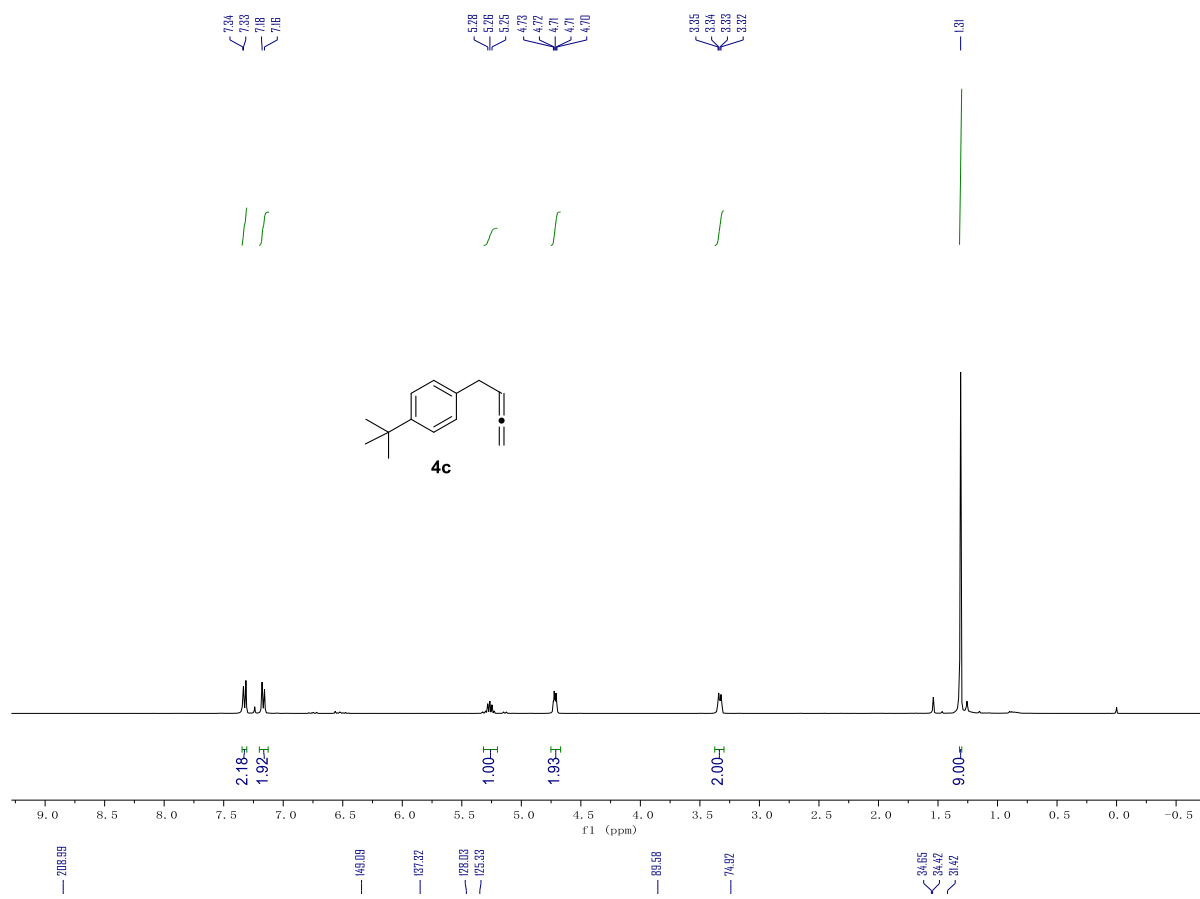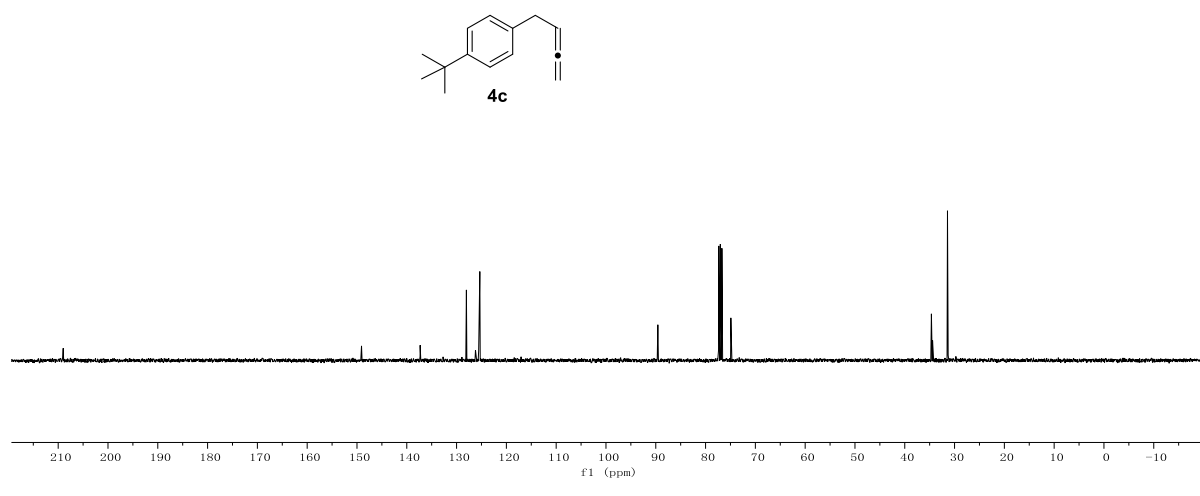

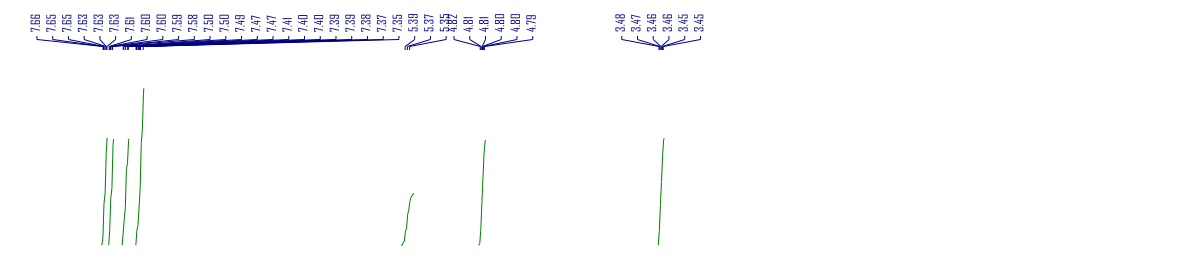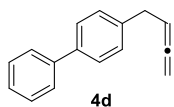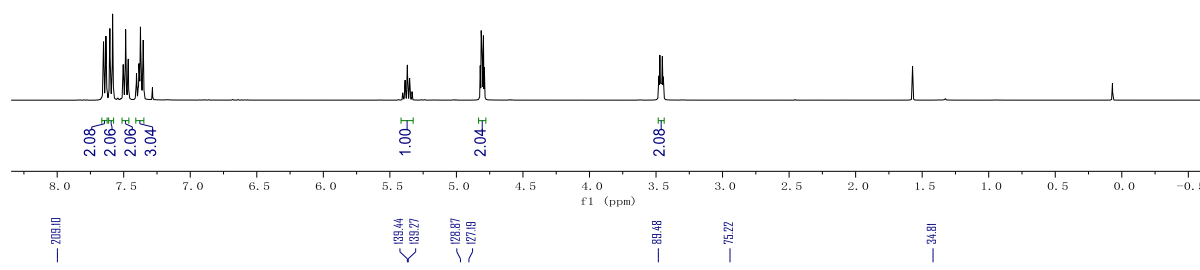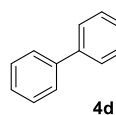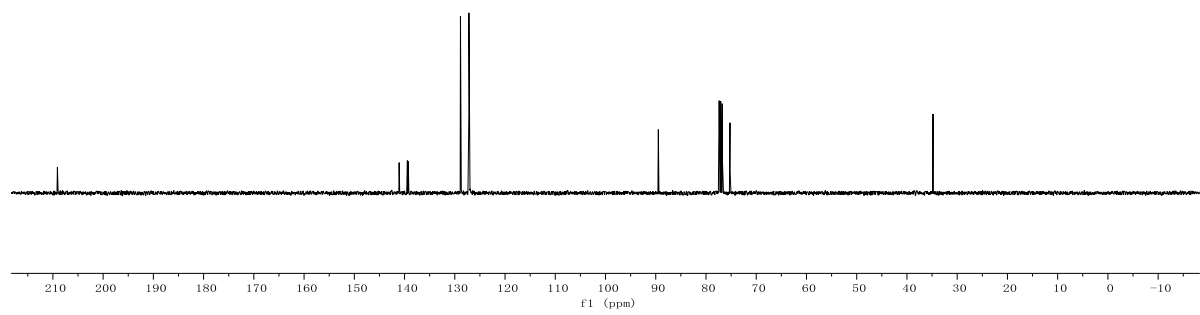

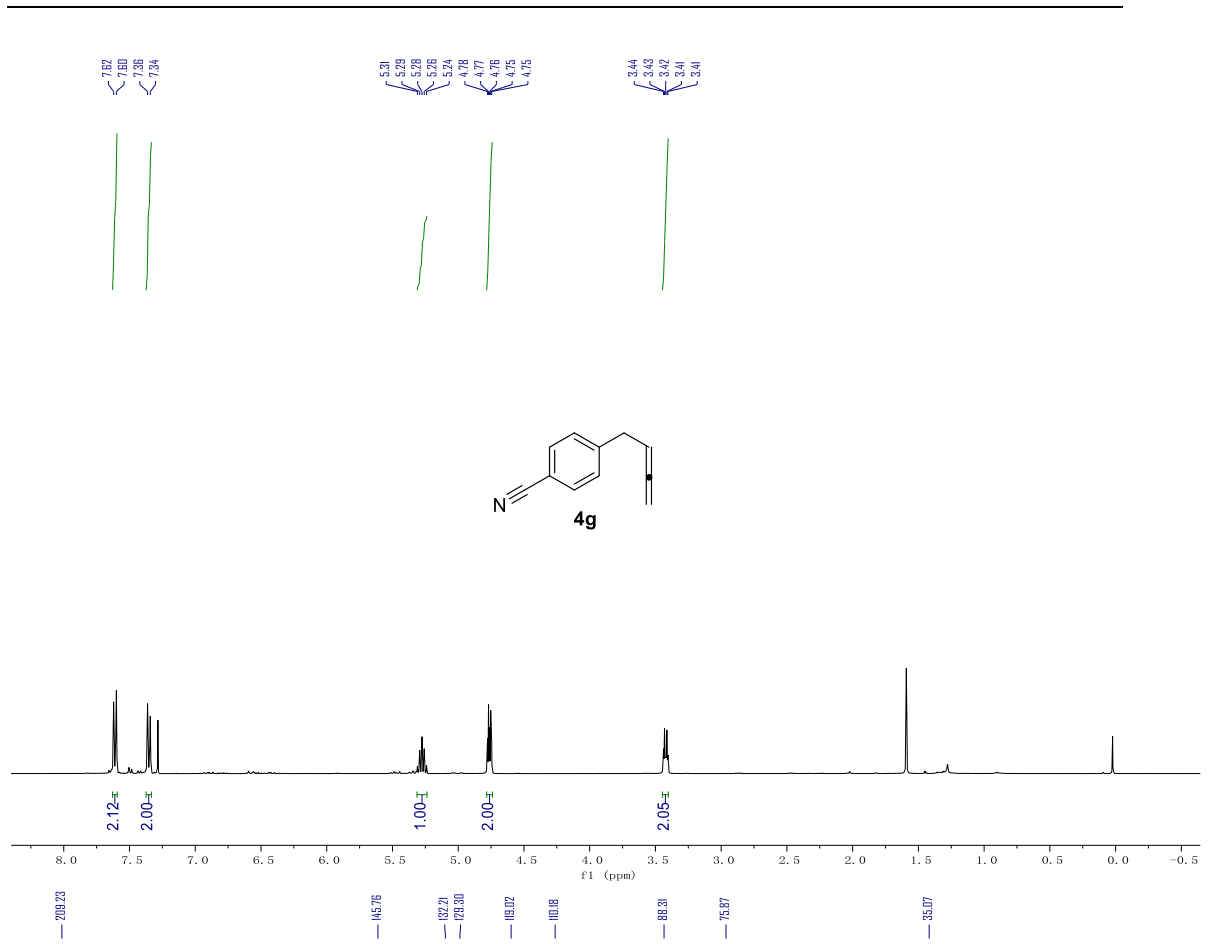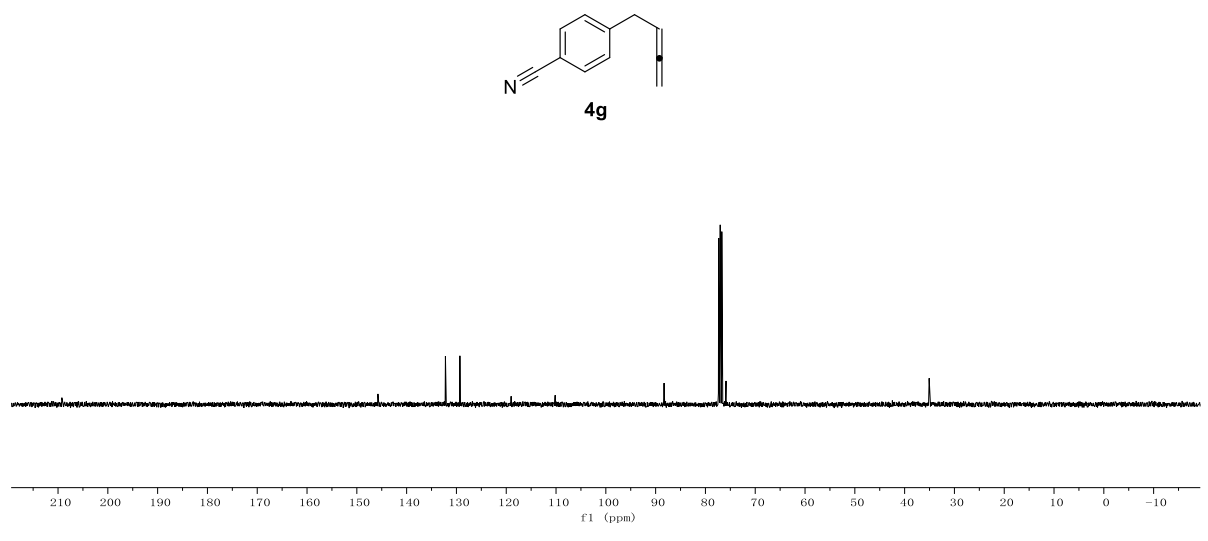

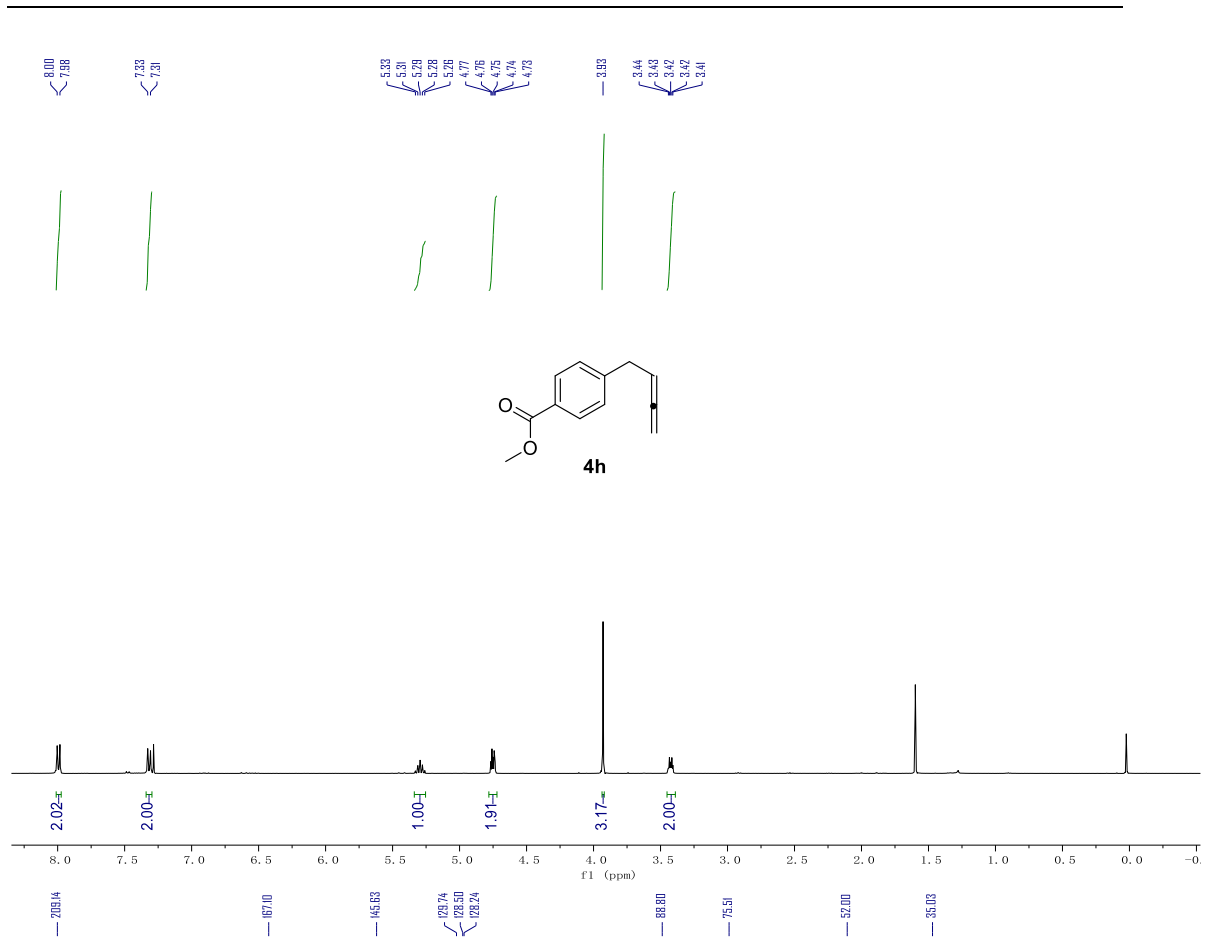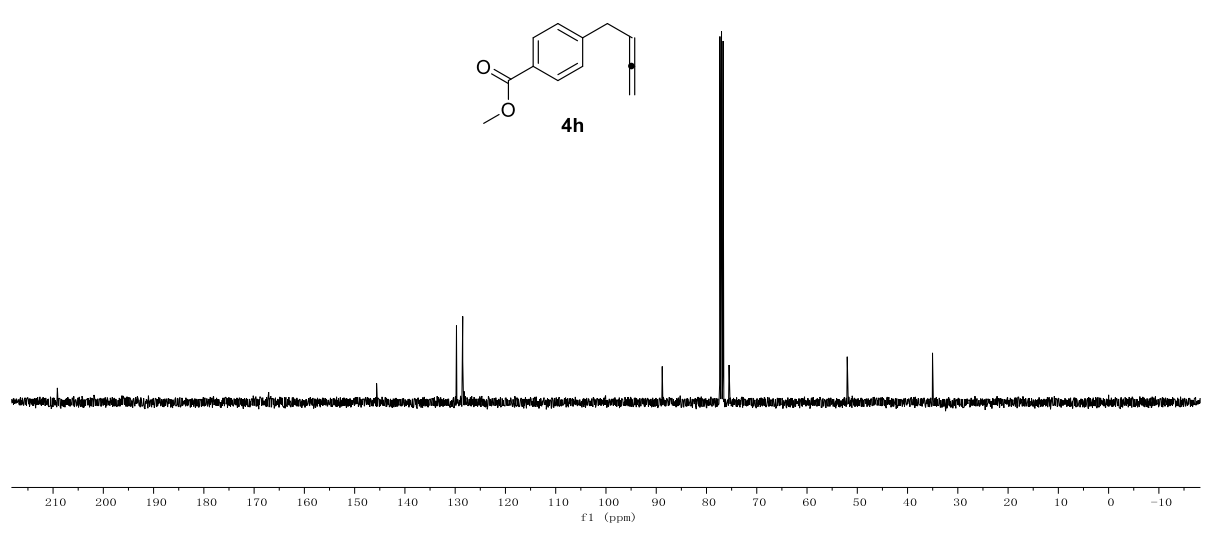

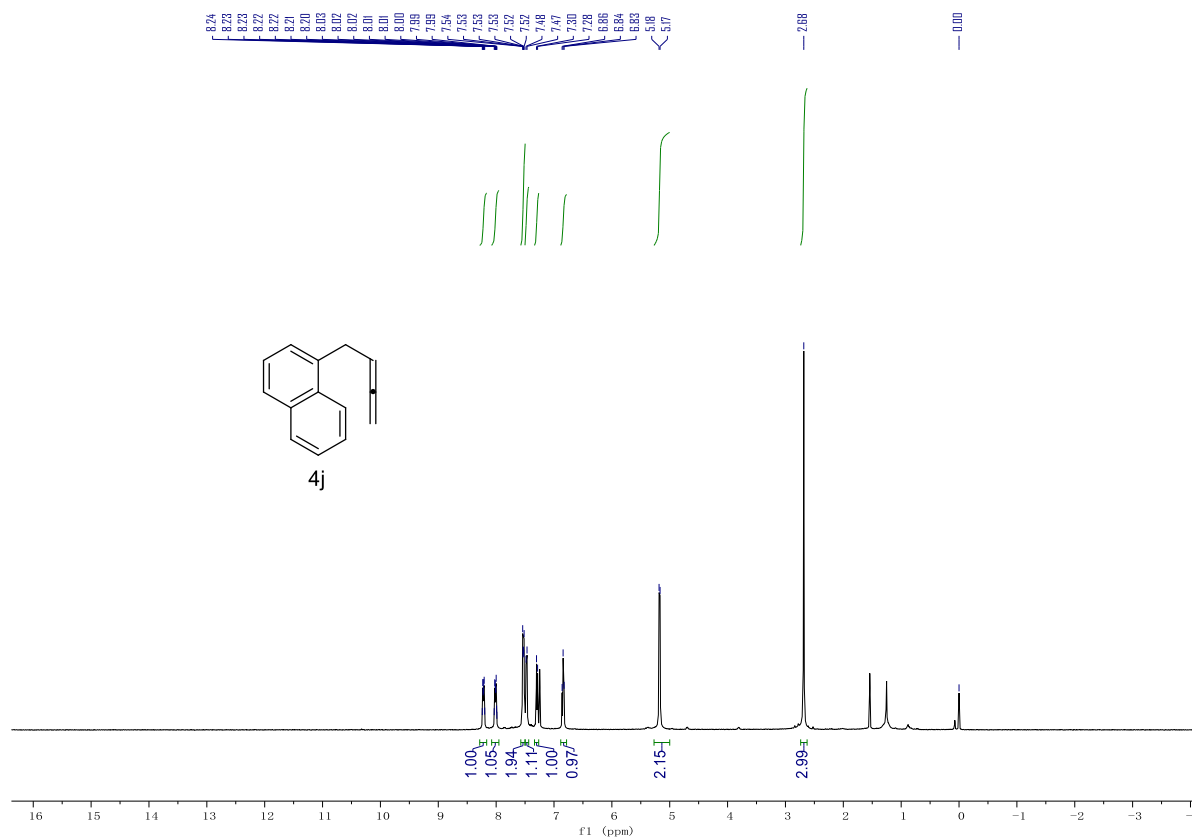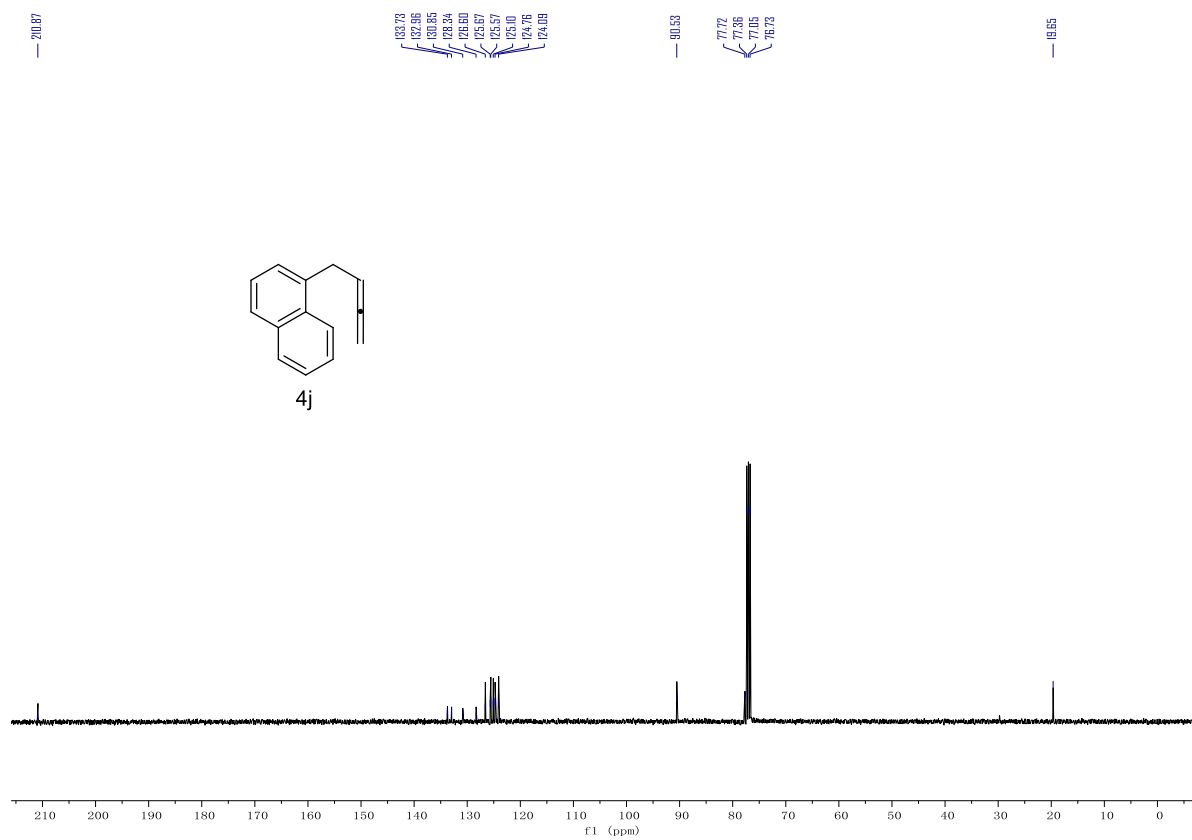

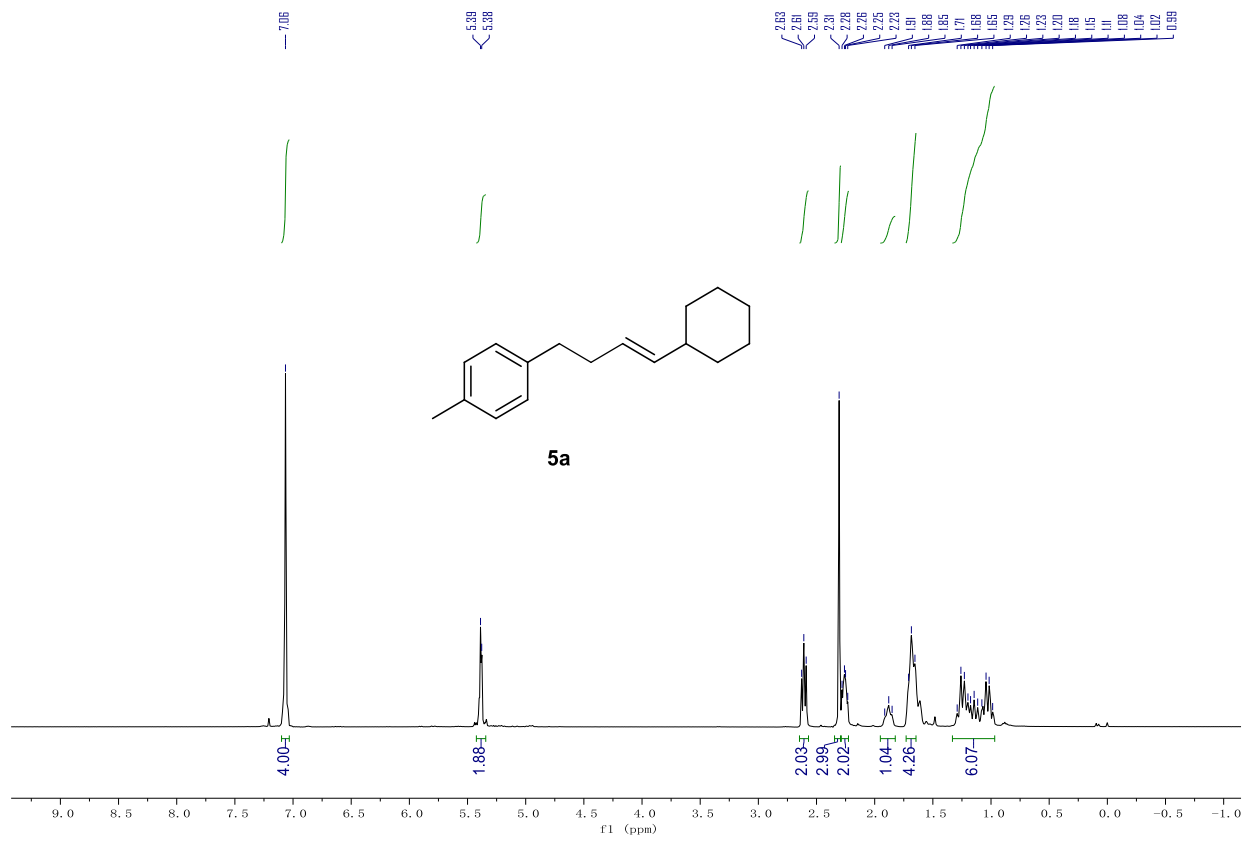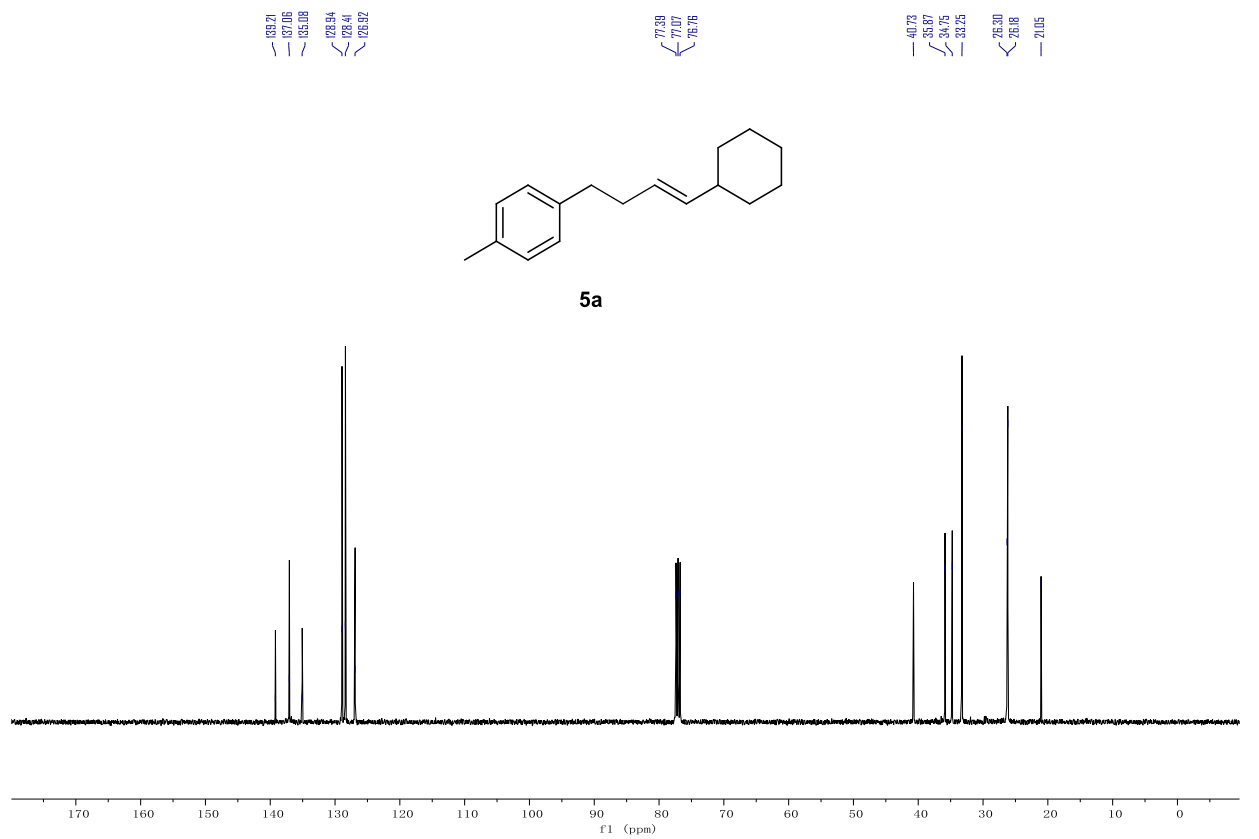

## 10. Copies of HR MS of Products

20230302\_GCMS\_EI\_Wangziyang\_S1 #609-621 RT: 6.24-6.29 AV: 13 SB: 56 6.11-6.26, 6.37-6.46 NL: 1.16E8  
T: FTMS + p EI Full ms [30.0000-300.0000]

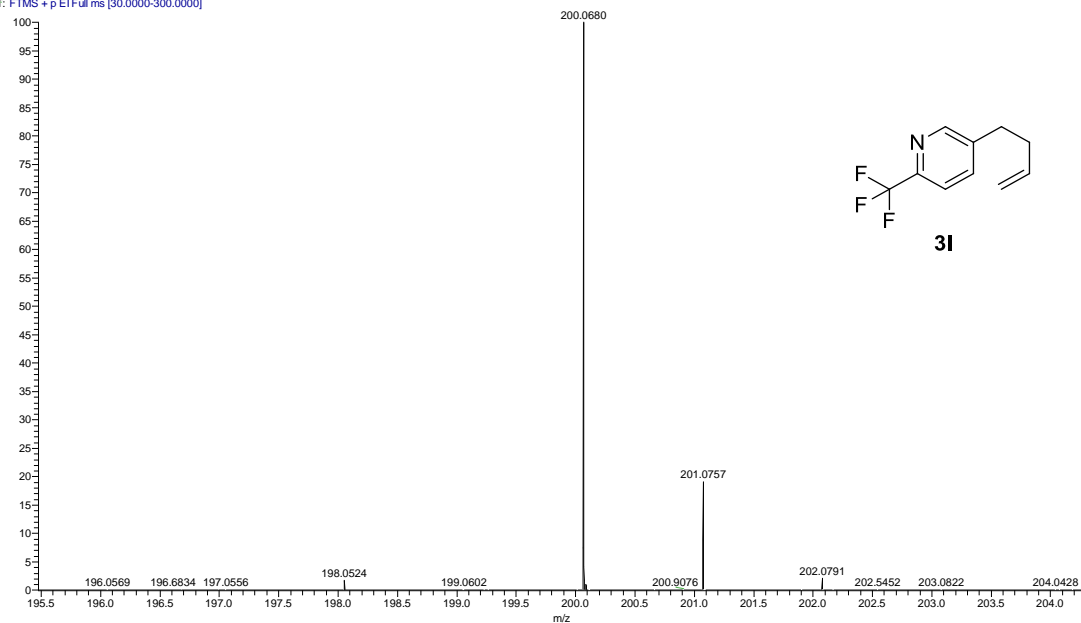

HRMS (EI) calcd for  $C_{10}H_{10}F_3N$ : 201.0765  $[M]^+$ ; found: 201.0757.

20230302\_GCMS\_EI\_Wangziyang\_S2 #711-722 RT: 6.69-6.74 AV: 12 SB: 58 6.48-6.67, 6.79-6.86 NL: 6.56E6  
T: FTMS + p EI Full ms [30.0000-300.0000]

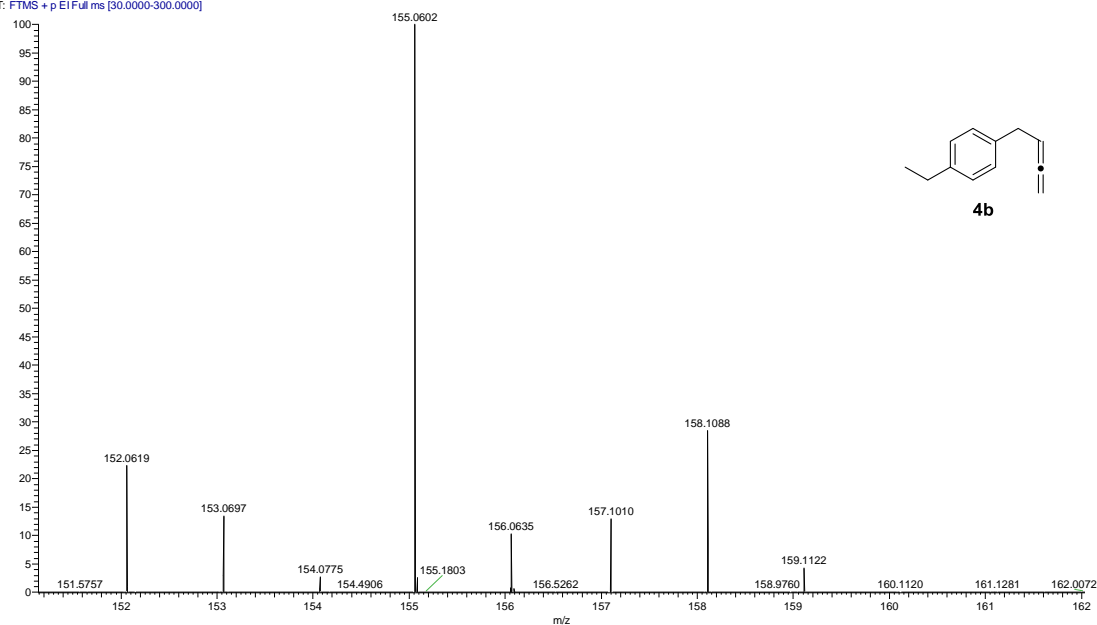

HRMS (EI) calcd for  $C_{12}H_{14}$ : 158.1096  $[M]^+$ ; found: 158.1094.

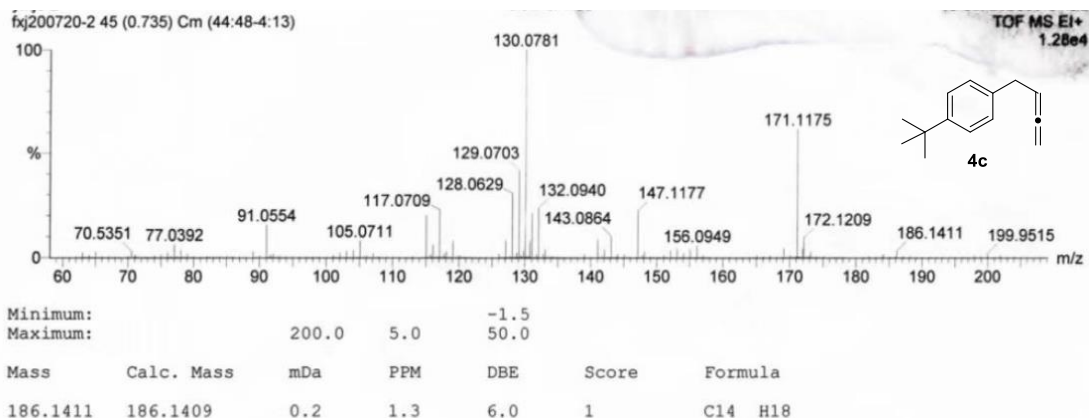

HRMS (EI) calcd for C<sub>14</sub>H<sub>18</sub>: 186.1409 [M]<sup>+</sup>; found: 186.1411.

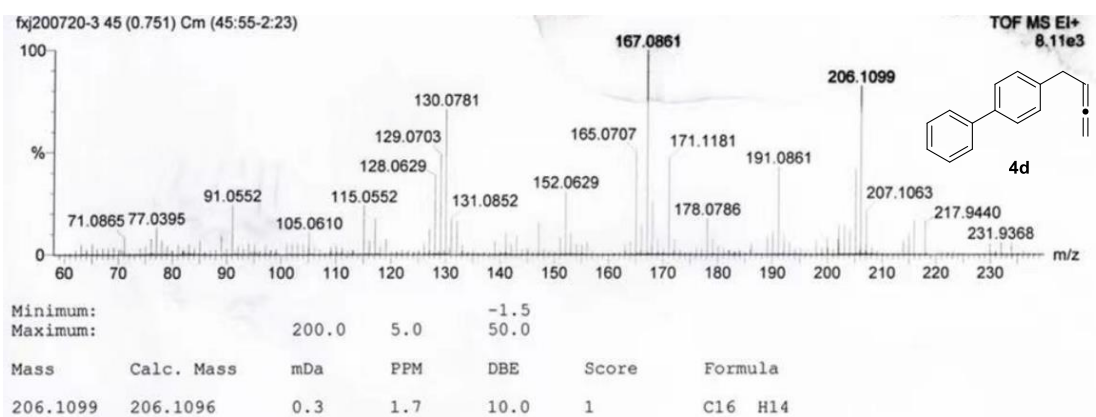

HRMS (EI) calcd for C<sub>16</sub>H<sub>14</sub>: 206.1096 [M]<sup>+</sup>; found: 206.1099.

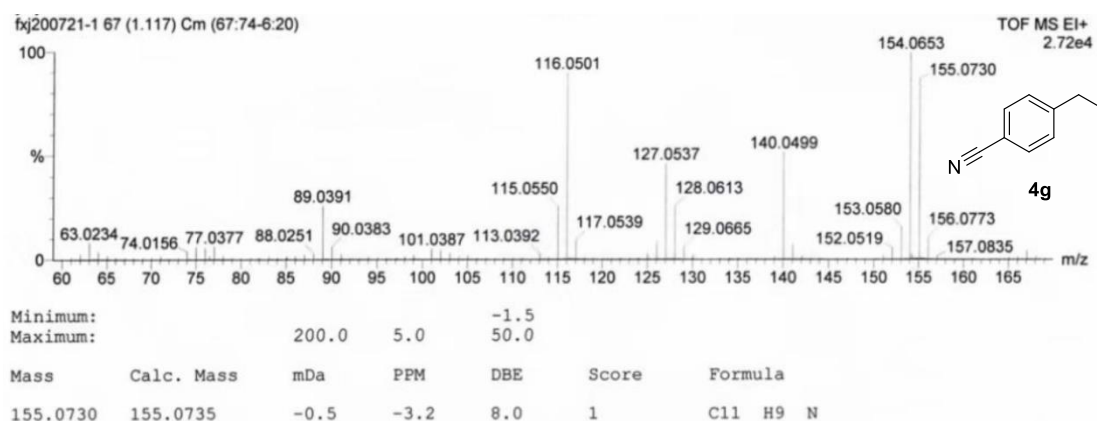

HRMS (EI) calcd for C<sub>11</sub>H<sub>9</sub>N: 155.0735 [M]<sup>+</sup>; found: 155.0730.



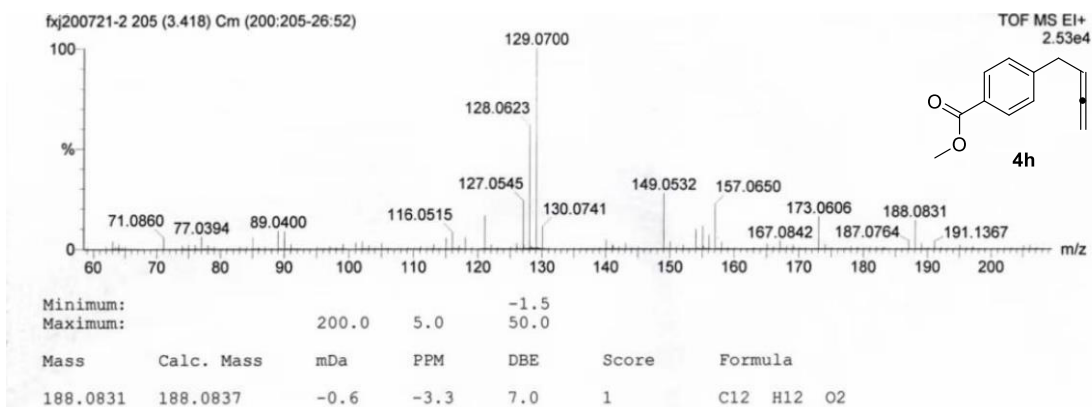

HRMS (EI) calcd for C<sub>12</sub>H<sub>12</sub>O<sub>2</sub>: 188.0837 [M]<sup>+</sup>; found: 188.0831.

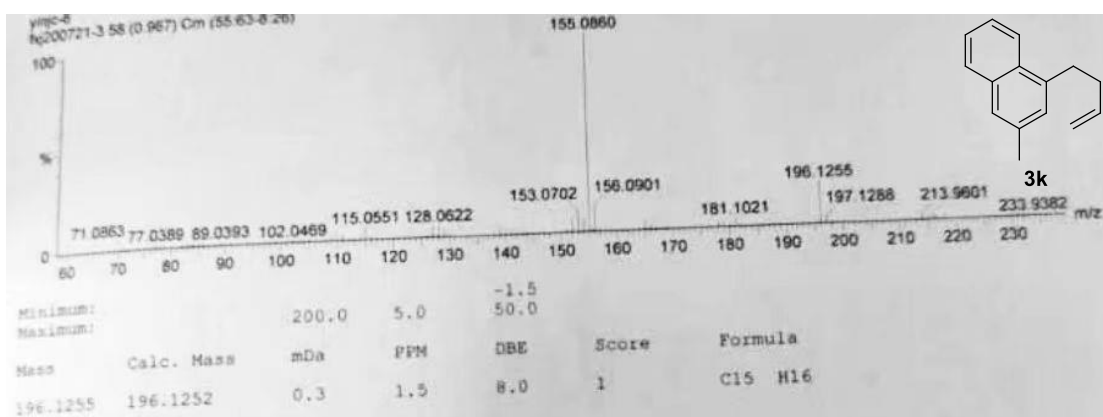

HRMS (EI) calcd for C<sub>15</sub>H<sub>16</sub>: 196.1252 [M]<sup>+</sup>; found: 196.1255.

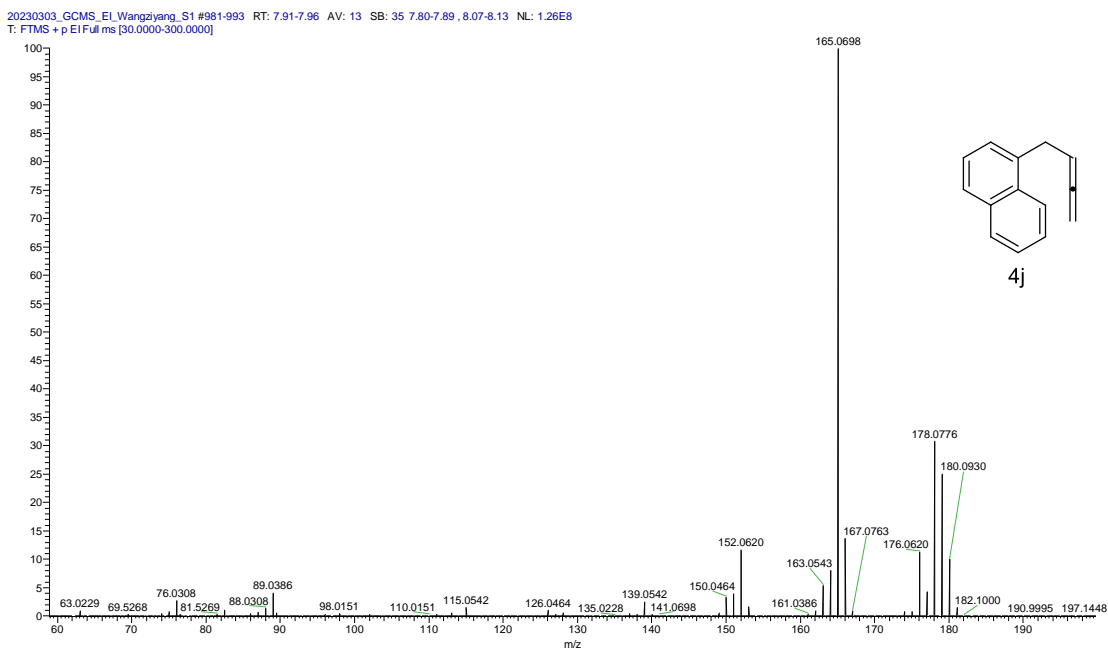

HRMS (EI) calcd for C<sub>14</sub>H<sub>12</sub>: 180.0939 [M]<sup>+</sup>; found: 180.0930.

20230309\_GCMS\_EI\_Wangziyang\_S1 #767-770 RT: 6.95-6.96 AV: 4 SB: 8 6.92-6.94 , 6.99-6.99 NL: 5.37E9  
T: FTMS + p.EI\Fulms [30.0000-500.0000]

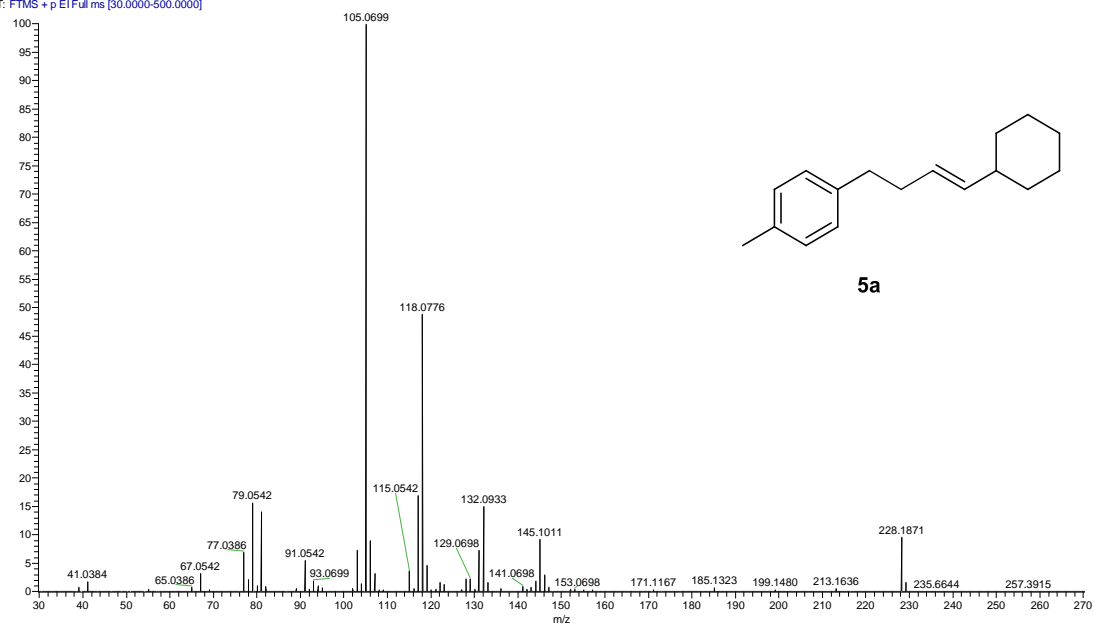

HRMS (EI) calcd for  $C_{17}H_{24}$ : 228.1878.  $[M]^+$ ; found: 228.1871.
